## **High Fat Diet-Induced Obesity Negatively Affects Whole Bone Bending Strength but not Cortical Structure in the Femur**

Nicholas J. Hanne<sup>a,1</sup>, Andrew J. Steward, PhD<sup>a,1</sup>, Jason M. Cox<sup>a</sup>, Elizabeth D. Easter<sup>b</sup>, Hannah L. Thornburg<sup>a</sup>, Marci R. Sessions<sup>a</sup>, Sriharsha V. Pinnamaraju<sup>a</sup>, Jacqueline H. Cole, PhD<sup>\*,a</sup>

Affiliations:

<sup>a</sup> Joint Department of Biomedical Engineering, University of North Carolina, Chapel Hill, NC, and North Carolina State University, Raleigh, NC, USA

<sup>b</sup> Materials Science and Engineering, North Carolina State University, Raleigh, NC, USA

<sup>1</sup>These authors contributed equally to this manuscript

Grant Supporters:

JHC: Eunice Kennedy Shriver National Institute of Child Health and Human Development (NICHD) of the NIH (award number K12HD073945)

### **\*Corresponding Author:**

Jacqueline H. Cole

Joint Department of Biomedical Engineering

University of North Carolina and North Carolina State University

911 Oval Drive

Campus Box 7115

Raleigh, NC 27695-7115

Tel: 919-515-5955

Fax: 919-513-3814

[jacquecole@ncsu.edu](mailto:jacquecole@ncsu.edu)

## 1 **Abstract**

2 Although body mass index is positively associated with bone mineral density, suggesting obesity  
3 is protective against fracture, elderly obese individuals experience greater fracture risk at certain  
4 sites than non-obese peers, suggesting bone structural or material changes contribute to fragility.  
5 Diet-induced obesity rodent studies have reported detrimental changes to bone microstructure and  
6 some apparent-level material properties, but tissue-level material changes are not well understood.  
7 Because adipose tissue is highly vascularized, and bone remodeling depends critically on  
8 functional vascular supply, concurrent effects on osteovascular perfusion and structure may  
9 provide insight about obesity-related bone fragility. This study aimed to determine the effects of  
10 obesity on both tissue-level bone properties and osteovascular properties that could negatively  
11 impact bone strength. Five-week-old male C57Bl/6J mice were fed either high fat diet (HFD) or  
12 control fat diet (CFD) for 17 weeks and received daily treadmill exercise or remained sedentary  
13 for eight weeks at ages 14-22 weeks. HFD negatively affected femur bending strength, with 18%  
14 lower yield load than CFD. Although HFD negatively altered cancellous microstructure in the  
15 distal femur, with 32% lower bone volume fraction than CFD, it did not affect cortical bone  
16 geometry in the femoral metaphysis or diaphysis. HFD caused increased carbonate substitution  
17 but had no effect on other composition metrics or apparent- or tissue-level material properties in  
18 the femoral diaphysis. Exercise did not affect bone strength or microstructure but increased  
19 endosteal mineralizing surface in the tibial diaphysis, mineral crystallinity and mineral-to-matrix  
20 ratio in the femur, and blood supply to the proximal tibial metaphysis. HFD did not affect blood  
21 supply in the tibia or 2D osteovascular structure in the distal femoral metaphysis, indicating that  
22 HFD negatively affects cancellous bone without affecting osteovasculature. This study reveals that

23 HFD negatively affected cancellous microstructure without affecting osteovascular structure, and  
24 whole-bone strength without altering cortical geometry or material properties.

25

26 **Keywords:**

27 obesity, high fat diet, bone strength, material properties, exercise

## 28 **1 Introduction**

29 Over half of adults worldwide are overweight or obese.<sup>(1)</sup> Higher bone mineral density (BMD), a  
30 primary determinant of bone strength<sup>(2)</sup> that is associated with decreased fracture incidence in  
31 elderly men and women,<sup>(3,4)</sup> is associated with increasing body mass index (BMI) in both obese  
32 and non-obese individuals.<sup>(4-7)</sup> However, increasing BMI in obese women is not as strongly  
33 correlated with increasing BMD and estimated material strength compared to non-obese  
34 women.<sup>(7,8)</sup> A meta-analysis reported that, despite having higher BMD, elderly obese individuals  
35 experience higher fracture incidence at particular sites compared to non-obese individuals – obese  
36 postmenopausal women have a higher risk of fracture in the spine, humerus, and leg bones but a  
37 lower risk of fracture in the hip and wrist, while older obese men have a higher risk of non-spinal  
38 fractures but a lower risk of fracture in the spine.<sup>(5)</sup> Since bone strength depends not only on BMD  
39 but also structural and material properties,<sup>(9,10)</sup> the differential fracture risk with obesity likely  
40 results from adverse changes to bone structure and/or material properties, although these effects  
41 are understudied in humans. In non-obese elderly women, mid-tibial cortical thickness and cortical  
42 area, measured with high-resolution peripheral quantitative computed tomography (HR-pQCT),  
43 were positively correlated with BMI.<sup>(11)</sup> Despite these beneficial changes to geometry, cortical  
44 bone material strength index (BMSi) in the tibia, measured with reference point indentation, had  
45 a weak negative correlation with both BMI and subcutaneous fat in the tibia.<sup>(11)</sup> Examining bone  
46 structure and material properties beyond HR-pQCT and BMSi is difficult in humans, but they have  
47 been examined in animal models of obesity. Previous diet-induced obesity studies in young, mostly  
48 male, mice reported detrimental changes to trabecular microstructure in the femur,<sup>(12-17)</sup> cancellous  
49 bone formation rate,<sup>(17)</sup> serum concentrations of osteocalcin, tartrate resistant acid phosphatase,<sup>(14)</sup>  
50 and carboxyl-terminal collagen crosslinks,<sup>(12)</sup> and cortical apparent material properties (bending

51 apparent modulus and ultimate stress) and fracture toughness,<sup>(18,19)</sup> but no change to femoral areal  
52 BMD,<sup>(18,19)</sup> cortical volumetric BMD (vBMD),<sup>(16)</sup> or cancellous tissue mineral density (TMD)<sup>(14-  
53 16)</sup> for high fat diet (HFD) compared to control fat diet (CFD). Therefore, HFD-induced obesity  
54 induces some structural and apparent-level material changes without changes to bone density,  
55 further supporting the notion of tissue-level effects that need to be further examined.

56

57 Vascular properties may contribute to the detrimental changes in cancellous bone structure with  
58 obesity. Adipose and bone tissues are highly vascularized and require adequate blood flow for  
59 formation and homeostasis.<sup>(20-23)</sup> In rodent studies, HFD increases the amount of adipose in the  
60 medullary cavity of long bones,<sup>(13,24-27)</sup> and adipose produces angiogenic cytokines that induce  
61 rapid vascularization.<sup>(20,28)</sup> Although increased bone vascularization is associated with increased  
62 bone formation rate in cancellous bone in normal-weight rats,<sup>(29)</sup> HFD is associated with  
63 detrimental changes to cancellous bone structure.<sup>(12-17)</sup> In addition to the amount of blood vessels,  
64 the structure of vasculature within bone is also important for remodeling; compared to non-  
65 remodeling bone surfaces, active sites of bone remodeling have increased number of capillaries  
66 within 50  $\mu\text{m}$  of the bone surfaces.<sup>(30,31)</sup> Exercise reduces the accumulation of adipose within the  
67 long bones of mice fed HFD<sup>(24,25)</sup> and stimulates osteovascular crosstalk pathways, such as VEGF  
68 and bone morphogenetic protein 2 (BMP2), that promote bone formation.<sup>(32,33)</sup> However, the  
69 effects of HFD and exercise on the osteovasculature is understudied. In this study, we examined  
70 changes in both bone and osteovascular tissues using a mouse model of diet-induced obesity, both  
71 with and without moderate treadmill activity. We hypothesized that obesity decreases the integrity  
72 of bone microstructure and material properties, while exercise induces new vascular and bone  
73 growth.

## 74 **2 Materials and Methods**

### 75 *2.1 Study Design*

76 The protocol for this work was approved by the Institutional Animal Care and Use Committee at  
77 North Carolina State University. Sixteen 5-week-old male C57Bl/6J mice (The Jackson  
78 Laboratory, Bar Harbor, ME) were fed a high fat diet (D12492 60% kcal fat, Research Diets, Inc.,  
79 New Brunswick, NJ) (n=8, “HFD” group) or a matched control fat diet (D12450B 10% kcal fat,  
80 Research Diets, Inc) (n=8, “CFD” group) for 17 weeks (Figure 1). Mice were housed with their  
81 groups (4-5 per cage) under controlled 12-hour diurnal photoperiod and fed their respective diets  
82 *ad libitum*. After 9 weeks of diet (Week 9, 14 weeks of age), after the obesity phenotype was  
83 established, mice were further divided into two activity groups, either daily treadmill exercise (n=4  
84 from each diet group, “CFD-Exercise” and “HFD-Exercise”) or stationary treadmill groups (n=4  
85 from each diet group, “CFD-Sedentary” and “HFD-Sedentary”).

86

87 Exercise mice were acclimated to a mouse treadmill (Exer 3/6, Columbus Instruments, Columbus,  
88 OH) over three days of increasing speeds (day 1: 6 m/min for 10 min, day 2: 9 m/min for 10 min,  
89 day 3: 12 m/min for 10 min). After acclimation, exercise groups ran on the treadmill 5 days per  
90 week for 8 weeks (8 m/min for 37 min at a 5-degree incline). Mice in the HFD group were unable  
91 to run for 30 min at 10 m/min, so the protocol was adjusted to 8 m/min for a longer time to provide  
92 the same running distance (300 m). Sedentary groups were placed on an immobile replica treadmill  
93 for the same duration as the exercise groups. Exercise and diet were continued for 8 weeks until  
94 the end of the study (Week 17, 22 weeks of age).

95

96 For dynamic histomorphometry, alizarin complexone (C0875, Sigma-Aldrich, St. Louis, MO) and  
97 calcein (A3882, Sigma-Aldrich) were injected intraperitoneally (30 mg/kg) at 10 and 3 days prior  
98 to sacrifice, respectively. At the conclusion of the study, and immediately before sacrifice, *in vivo*  
99 measurements of tibial perfusion were made under anesthesia (described below). Mice were  
100 euthanized by CO<sub>2</sub> asphyxiation followed by cervical dislocation. For serum assays, blood was  
101 immediately collected through cardiac puncture and left at room temperature for 30 min to clot,  
102 after which the serum was separated by centrifugation (2,000 x g for 10 min) and stored at -80°C.  
103 The left and right femora and tibiae were dissected. The left femur and both tibiae were fixed in  
104 10% neutral buffered formalin at 4°C for 36 hours, then stored in 70% ethanol at 4°C. The unfixed  
105 right femur was wrapped in 1X phosphate buffered saline (PBS)-soaked gauze and fresh frozen at  
106 -20°C.

107

## 108 *2.2 Obesity Phenotype*

109 Body mass and serum glucose were measured weekly in all groups following the initiation of  
110 treadmill exercise in Week 9. Serum glucose concentration was measured from the tail vein after  
111 6 hours of fasting (AlphaTrak 2 Blood Glucose Monitoring System, Abbott Laboratories, Abbott  
112 Park, IL). Glucose tolerance tests (GTT) were performed following 6 hours of fasting at Week 13  
113 and Week 17 to assess ability to clear a bolus injection of glucose from the blood, which is a test  
114 for the development of diabetes. For the test, a 0.3 g/mL (30%) glucose solution was injected  
115 intraperitoneally at 1 g of glucose per kg of body mass. Serum glucose concentration was measured  
116 immediately prior to the injection of glucose and 15, 30, 60, 90, and 120 min after the injection.  
117 Glucose concentrations over the maximum threshold of the glucometer were recorded as 750

118 mg/dL (upper range concentration of the AlphaTrak 2). The areas under the curve for the GTT  
119 results were calculated using the trapezoid rule.

120

### 121 *2.3 Bone Perfusion (Tibia)*

122 *In vivo* tibial perfusion was measured at the endpoint of the study in the right proximal tibial  
123 metaphysis with laser Doppler flowmetry (LDF). LDF can quantify vascular perfusion – a  
124 functional measure of bone blood flow comprised of amount of vasculature, velocity and direction  
125 of blood flow, and vascular permeability – in murine tibiae.<sup>(34,35)</sup> Perfusion readings were taken  
126 just prior to sacrifice using an LDF monitor with 785-nm light source and selectable 3 kHz lowpass  
127 filter (moorVMS-LDF, Moor Instruments Ltd., Axminster, UK) paired with a needle probe (VP4,  
128 0.8 mm outer diameter, 0.25 mm fiber separation), as follows. After 6 hours of fasting, mice were  
129 anesthetized with 2% isoflurane in pure oxygen. Mice were placed supine, and the shaved right  
130 hindlimb was taped to a heated surgical platform. A 2-5 mm long was made over the anteromedial  
131 side of the proximal tibial metaphysis, the periosteum was gently scraped away from the  
132 metaphysis, and the LDF probe was held flush to the bone with a micromanipulator (MM3-ALL,  
133 World Precision Instruments, Sarasota, FL) for a 30-second recording. The probe was removed  
134 and replaced two more times, and the weighted mean of the three recordings was used for analysis.  
135 Measurements are expressed in perfusion units (PU), arbitrary units that are standard for LDF.

136

### 137 *2.4 Cancellous and Cortical Bone Structure (Femur)*

138 Cancellous bone microstructure and cortical bone geometry were assessed in the left femur by  
139 scanning in 70% ethanol with micro-computed tomography (micro-CT,  $\mu$ CT80, SCANCO  
140 Medical AG, Brüttisellen, Switzerland) using a 10- $\mu$ m voxel size, 45 kV peak X-ray tube potential,



141 177  $\mu$ A X-ray intensity, and 800-ms integration time. Volumes of interest (VOI) were analyzed  
142 using the scanner's software (SCANCO v.6.6) for standard cortical and cancellous bone  
143 metrics.<sup>(36)</sup> The distal metaphyseal VOI was defined as 10% of the total femur length positioned  
144 proximal to the distal growth plate. The cancellous and cortical bone were contoured and analyzed  
145 separately in the metaphysis. The diaphyseal VOI was defined as 15% of the total femur length,  
146 centered between the distal growth plate and the middle of the third trochanter. The mid-diaphyseal  
147 VOI (used for estimating apparent-level material properties with three-point bending data) was  
148 defined as a 2.5-mm section with the same center as the diaphyseal VOI.

149

### 150 *2.5 Cortical Bone Remodeling (Tibia)*

151 Dynamic indices of cortical bone remodeling were examined in the right tibial diaphysis using  
152 dynamic histomorphometry. The right tibia was embedded in methylmethacrylate, then sectioned  
153 transversely in 200- $\mu$ m thick sections just distal to the tibiofibular junction under constant water  
154 irrigation using a low-speed precision saw (IsoMet Low Speed Precision Cutter, Buehler, Lake  
155 Bluff, IL). Sections were glued to glass slides with cyanoacrylate glue and sanded to 10-30  $\mu$ m  
156 thickness with increasing grit sandpaper.<sup>(37)</sup> Two sections from each bone were imaged at 40X on  
157 a Zeiss LSM 880 laser scanning microscope with Airyscan (Carl Zeiss Microscopy, Thornwood,  
158 NY). Standard dynamic histomorphometry parameters – mineralizing surface per bone surface  
159 (MS/BS), mineral apposition rate (MAR), and bone formation rate (BFR/BS) – were measured on  
160 two sections per mouse using ImageJ (version 1.51v) and Photoshop (version CC 2018m, Adobe  
161 Systems Inc., San Jose, CA),<sup>(38,39)</sup> and the mean values were used for analysis.

162

### 163 *2.6 Whole Bone and Apparent-Level Mechanical Properties (Femur)*

164 The right femur underwent three-point bending to failure to measure whole bone mechanical  
165 properties and estimated apparent-level material properties. Immediately prior to testing, the femur  
166 was brought to room temperature and placed in a 37°C bath of 1X PBS for 60 sec. The bone was  
167 centered over a 6.5-mm lower span (40% average femur length) with the anterior side facing up  
168 so that the anterior diaphysis was loaded in compression. Three-point bending was performed to  
169 failure using an actuator speed of 0.025 mm/sec (EnduraTec ELF 3220, Bose Corp., Minnetonka,  
170 MN). Force (500-g capacity load cell, Sensotec Model 31/6775-06, Honeywell Sensotec,  
171 Columbus, OH) and displacement were recorded at 100 Hz. After failure, the femur was  
172 immediately wrapped in PBS-soaked gauze and returned to -20°C. Yield load ( $F_{\text{yield}}$ ), maximum  
173 (ultimate) load ( $F_{\text{ultimate}}$ ), stiffness, post-yield deformation (PYD), and work-to-fracture were  
174 calculated from load-displacement curves with MATLAB® (R2017, The MathWorks, Inc., Natick,  
175 MA).<sup>(40)</sup> Yield was calculated as the point where a line with a 5% decrease in stiffness intersected  
176 the force-displacement curve.<sup>(40)</sup> PYD was calculated as the difference between the deformation at  
177 yield and the deformation at failure. The stress-strain curve was estimated using the cross-sectional  
178 moment of inertia about the bending axis calculated from the mid-diaphyseal VOI in the micro-  
179 CT scans of the left femur (described above).<sup>(41)</sup> Yield stress ( $\sigma_{\text{yield}}$ ), maximum (ultimate) stress  
180 ( $\sigma_{\text{ultimate}}$ ), and Young's modulus (E) were calculated from these estimated stress-strain curves with  
181 MATLAB®.

182

### 183 *2.7 Tissue-Level Mechanical Properties (Femur)*

184 Cortical bone material properties were examined with nanoindentation in the right femoral  
185 diaphysis. Following three-point bending, the right femur was already divided in half at the failure  
186 point (position of the top loading point); a 1-2 mm transverse section was cut just distal to the

187 distal half and affixed to a glass slide with the fractured end facing up. The remainder of the distal  
188 half of the right femur was reserved for immunofluorescence (described below). The section was  
189 smoothed with increasing grit sandpaper (120 followed by 600 grit) and then polished with 3  $\mu\text{m}$   
190 diamond slurry (90-3DL3, Allied High Tech Products Inc, Rancho Dominguez, CA) until  
191 smooth.<sup>(42)</sup> Before nanoindentation, Raman spectroscopy was performed on the proximal surface  
192 of the polished cortical section (described below). Then nanoindentation was performed on the  
193 same samples using a Hysitron TriboIndenter TI 980 with a diamond Berkovich tip (Bruker,  
194 Billerica, MA). The instrument was calibrated by performing indentations in air and a fused quartz  
195 standard. Each bone was indented in the anterior and posterior regions of the mid-cortex in a 4x4  
196 grid of points equally spaced 15  $\mu\text{m}$  apart. A trapezoidal loading function with 60 sec loading to  
197 3000  $\mu\text{N}$ , 30 sec holding at peak load, and 6 sec unloading was performed at each point.<sup>(42,43)</sup> The  
198 fused quartz standard was tested before and after each mid-cortex grid to validate calibration and  
199 remove organic material from the tip. Force-displacement curves exhibiting nonlinearity during  
200 loading were removed from analysis. Hardness (H) and reduced modulus ( $E_r$ ) were calculated from  
201 the force-displacement curve during unloading and were averaged across each region grid, giving  
202 a mean for each anterior and posterior region.<sup>(44)</sup>

203

## 204 *2.8 Cortical Bone Composition (Femur)*

205 Cortical bone tissue composition was measured with Raman spectroscopy (XploRA PLUS  
206 confocal Raman microscope, HORIBA Scientific, Piscataway, NJ). Raman spectra were collected  
207 with a 785-nm laser at 50X magnification at the endosteal edge, mid-cortex, and periosteal edge  
208 in the posterior, lateral, anterior, and medial quadrants of the section (Figure 2A). Mid-cortex  
209 quadrant scans were comprised of a 2 x 5 grid of point collections spaced 5  $\mu\text{m}$  apart, while

210 endosteal and periosteal quadrant scans were comprised of a line of 6 points spaced 2  $\mu\text{m}$  apart,  
211 aligned parallel to and positioned 5-10  $\mu\text{m}$  in from the bone surface. Each point was a 30-second  
212 accumulation in the 800-1800  $\text{cm}^{-1}$  range. The spectrometer software (LabSpec 6, v.6.5.1.24)  
213 automatically performed baseline correction, while the remaining analysis was performed in  
214 MATLAB<sup>®</sup>.

215  
216 Spectra were normalized relative to the phosphate  $\nu_1$  maximum intensity (930-980  $\text{cm}^{-1}$ ), and the  
217 maximum normalized intensities were determined in the regions corresponding to the summation  
218 of proline (830-863  $\text{cm}^{-1}$ ) and hydroxyproline (864-899  $\text{cm}^{-1}$ ), phosphate  $\nu_1$  (930-980  $\text{cm}^{-1}$ ),  
219 carbonate  $\nu_1$  (1055-1090  $\text{cm}^{-1}$ ), amide III (1220-1300  $\text{cm}^{-1}$ ), and amide I (1616-1720  $\text{cm}^{-1}$ ) (Figure  
220 2B).<sup>(45,46)</sup> Several standard metrics were calculated, as follows.<sup>(45)</sup> Mineral-to-matrix ratios were  
221 calculated as the ratio of the phosphate  $\nu_1$  normalized intensity relative to amide I, amide III, or  
222 summed proline and hydroxyproline normalized intensity. The carbonate-to-matrix ratio was  
223 calculated as the ratio of the carbonate  $\nu_1$  to amide I normalized intensities. Carbonate substitution  
224 was calculated as the normalized intensity of carbonate  $\nu_1$ . Mineral maturity (crystallinity) was  
225 calculated as the inverse of the full-width at half maximum (FWHM) of a single-order Gaussian  
226 curve fit to the phosphate  $\nu_1$  band. Each of these Raman metrics were averaged across each  
227 measurement grid within quadrants, giving a mean for each region (endosteal edge, mid-cortex, or  
228 periosteal edge) at each quadrant (posterior, lateral, anterior, and medial).

229

### 230 *2.9 Osteovascular Structure (Femur)*

231 Vascular structure and proximity to bone surfaces were examined in the distal femoral metaphysis  
232 using thick-section immunofluorescence to quantify the amount of blood vessels, labeled by  
233 endomucin (EMCN), and bone surfaces, labeled by collagen type I (COL-1).<sup>(47)</sup> The remaining

234 distal portion of the right femur samples were fixed overnight in 10% neutral buffered formalin at  
235 4°C, decalcified in 0.5M ethylenediaminetetraacetic acid at 4°C for 24 hours, and then embedded  
236 in cryoprotectant embedding media comprised of 8% gelatin (G1890, Sigma-Aldrich), 2%  
237 polyvinylpyrrolidone (P5288, Sigma-Aldrich), and 20% sucrose (S7903, Sigma-Aldrich) in 1X  
238 PBS. Samples were sectioned longitudinally in 100- $\mu$ m thick sections on a cryotome at -23°C (HN  
239 525NX, Thermo Fisher Scientific, Waltham, MA). Sections were stained overnight at 4°C using  
240 unconjugated primary antibodies at 1:100 dilution for endomucin (rat anti-mouse sc-65495, Santa  
241 Cruz Biotechnology, Santa Cruz, CA) and at 1:200 dilution for collagen type I (rabbit anti-mouse,  
242 AB765P, MilliporeSigma, Burlington, MA). Secondary antibodies at 1:200 dilution were added  
243 for 90 min at room temperature (goat anti-rat with AlexaFluor 647 ab150159, Abcam, Cambridge,  
244 UK; goat anti-rabbit with AlexaFluor 488 A11006, Invitrogen, Carlsbad, CA). DAPI at 2  $\mu$ g/mL  
245 was added for 10 min at room temperature to counterstain nuclei. All sections were imaged at 20X  
246 on a Zeiss LSM 880 laser scanning microscope with Airyscan. Regions with positive COL-1 and  
247 EMCN labeling were traced by hand in ImageJ (version 1.51v) in a region of interest (ROI) that  
248 was 10% of the femur length and positioned just proximal to the distal growth plate (same as the  
249 micro-CT metaphyseal VOI). Vascular structure was analyzed by calculating EMCN<sup>+</sup> area per  
250 total area, COL-1<sup>+</sup> area per total area, and the distance between EMCN<sup>+</sup> and COL-1<sup>+</sup> surfaces in  
251 MATLAB<sup>®</sup>. Several samples were destroyed or lost during sectioning, so only a subset of samples  
252 were analyzed (n = 1 CFD-Sedentary, n = 3 CFD-Exercise, n = 2 HFD-Sedentary, n = 1 HFD-  
253 Exercise).

254

255 *2.10 Osteovascular Crosstalk (Serum)*

256 To examine osteovascular crosstalk between endothelial cells and osteoblasts, serum  
257 concentrations of bone morphogenetic protein 2 (BMP2) and vascular endothelial growth factor A  
258 (VEGF-A) were measured using serum collected and stored at the endpoint of the study. Serum  
259 concentrations were measured with enzyme-linked immunosorbent assays (ELISA) per the  
260 manufacturers' instructions, using mouse-specific kits for BMP2 (ab119582, Abcam) and VEGF-  
261 A (KMG0111, Thermo Fisher Scientific). All samples were analyzed in duplicate using a plate  
262 reader (Synergy H1M, BioTek Instruments, Inc., Winooski, VT).

263

### 264 *2.11 Statistical Analyses*

265 All statistical models were analyzed in SAS (SAS University Edition v. 9.4, SAS Institute Inc.,  
266 Cary, NC) or R (R v. 3.5.1, R Foundation for Statistical Computing, Vienna, Austria) to determine  
267 the following: 1) effects of HFD and exercise on body mass and fasting serum glucose  
268 concentration at each week after treadmill exercise was started; 2) effects of HFD and exercise on  
269 metrics of glucose tolerance, bone perfusion, cancellous and cortical bone microstructure, cortical  
270 bone remodeling, whole bone mechanical properties, apparent-level material properties,  
271 osteovascular structure, and osteovascular crosstalk; 3) effects of HFD and exercise on cortical  
272 bone material properties measured with nanoindentation and composition measured with Raman  
273 spectroscopy. All data are presented as the group mean  $\pm$  standard deviation unless otherwise  
274 stated. Results from nanoindentation and Raman spectroscopy are presented as mean across the  
275 scanned regions.

276

277 For analysis #1, mouse mass and serum glucose were compared between diet and activity groups  
278 across weekly timepoints using a repeated measures factorial model with interaction between all

279 terms (SAS ‘MIXED’ procedure). Diet (CFD or HFD) and activity (sedentary or exercise) were  
280 modeled as fixed factors, while week was modeled as a repeated measure within each mouse. The  
281 residual variance was modeled assuming compound symmetry covariance, chosen as the  
282 covariance structure that provided the best fit to the data. Predicted least-squares means with  
283 Tukey-Kramer adjustment for multiple comparisons were used to analyze effect differences  
284 between diet and activity groups, with interaction, at each timepoint (i.e., CFD-Sedentary vs. HFD-  
285 Sedentary at Week 9).

286  
287 For analysis #2, outcome parameters were compared between diet and activity, with interaction,  
288 using two-way analysis of variance (R ‘aov’ function). Tukey’s post-hoc tests were used to  
289 compare group means. Vascular structure parameters were analyzed with a similar model, but the  
290 interaction between diet and activity was not modeled due to missing data and thus insufficient  
291 power to analyze the full model. Three-point bending parameters were further analyzed with two  
292 analysis of covariance (ANCOVA) models, one with mass as the continuous covariate and one  
293 with femur length as the continuous covariate.<sup>(40,48)</sup>

294  
295 For analysis #3, the same repeated measures factorial model used in analysis #1 was used (SAS  
296 ‘MIXED’ procedure), but parameters were compared between diet and activity groups across scan  
297 region (anterior and posterior for nanoindentation; posterior, lateral, anterior, and medial for  
298 Raman spectroscopy). The residual variance was modeled assuming compound symmetry  
299 covariance. Predicted least-squares means with Tukey-Kramer adjustment for multiple  
300 comparisons were used to analyze pairwise differences between diet and activity groups, with  
301 interaction (i.e., HFD-Sedentary vs. HFD-Exercise).

## 302 **3 Results**

### 303 *3.1 Obesity Phenotype*

304 Weekly measures of mouse mass, serum glucose, and monthly glucose tolerance tests confirmed  
305 that the high fat diet produced an obese phenotype in this study. The HFD group had consistently  
306 greater body mass at all timepoints compared to the CFD group ( $p = 0.0016$ , Figure 3A). At the  
307 end of the study, after 17 weeks of diet, the HFD group ( $43.0 \pm 5.2$  g) weighed 33% more than the  
308 CFD group ( $32.4 \pm 1.7$  g,  $p < 0.0001$ ). Overall, the HFD group had increased fasting glucose  
309 concentrations relative to the CFD group ( $p = 0.0054$ ), but not at every timepoint (Figure 3B). At  
310 the end of the study, fasting glucose concentration was 27% higher in the HFD group ( $246 \pm 28$   
311 mg/dL) than in the CFD group ( $193 \pm 36$  mg/dL,  $p = 0.014$ ). Exercise did not affect body mass ( $p$   
312  $= 0.76$ ) or fasting serum glucose concentration ( $p = 0.57$ ).

313  
314 The HFD group had a lower glucose tolerance, metabolizing a bolus of glucose more slowly  
315 (represented by larger area under the curve) than did the CFD group at Week 13 (HFD:  $33.2 \pm 9.0$   
316  $p = 0.017$  vs. CFD:  $26.2 \pm 2.2$ ) and Week 17 (HFD:  $39.0 \pm 9.0$ ,  $p = 0.0004$  vs. CFD:  $26.5 \pm 7.4$ )  
317 (Figure 3C). At Week 13, exercise nearly improved glucose tolerance in the HFD-Exercise group  
318 ( $28.2 \pm 2.8$ ) relative to the HFD-Sedentary group ( $38.2 \pm 8.1$ ,  $p = 0.066$ ), bringing the glucose  
319 tolerance of HFD-Exercise similar to that of CFD-Sedentary ( $26.0 \pm 5.1$ ,  $p = 0.92$ ) and CFD-  
320 Exercise ( $26.0 \pm 1.7$ ,  $p = 0.96$ ) groups. The benefit of exercise in the HFD group did not persist,  
321 however, and at Week 17, the HFD-Exercise ( $39.1 \pm 4.5$ ) and HFD-Sedentary ( $38.9 \pm 6.7$ ) groups  
322 had similar glucose tolerance ( $p = 1.00$ ) elevated above that of the CFD groups (CFD-Exercise:  
323  $28.0 \pm 5.2$ ; CFD-Sedentary:  $25.0 \pm 3.9$ ). Several mice had glucose concentrations that were above  
324 the detectible range of the glucometer, which artificially decreased the area under the curves.



325 During the Week 13 GTT, one HFD-Sedentary mouse had over-range readings at three timepoints,  
326 and one CFD-Sedentary mouse had over-range readings at one timepoint. During the Week 17  
327 GTT, one HFD-Sedentary and one HFD-Exercise mouse had over-range readings at two  
328 timepoints each, and one CFD-Exercise had an over-range reading at one timepoint.

329

### 330 *3.2 Bone Perfusion (Tibia)*

331 At the end of the study, *in vivo* perfusion in the proximal tibial metaphysis was 29% greater in  
332 exercise groups ( $12.2 \pm 3.0$  PU) compared to sedentary groups ( $9.5 \pm 1.6$  PU,  $p = 0.044$ , Figure 4).  
333 Tibial perfusion was similar between HFD ( $11.7 \pm 2.6$  PU) and CFD groups ( $10.1 \pm 2.7$  PU,  $p =$   
334  $0.23$ ).

335

### 336 *3.3 Cancellous and Cortical Bone Structure (Femur)*

337 High fat diet had detrimental effects on trabecular microstructure in the distal femoral metaphysis.  
338 Compared to CFD, the HFD group had 32% lower bone volume fraction (BV/TV, HFD:  $11.2 \pm$   
339  $3.5\%$  vs. CFD:  $16.4 \pm 3.2\%$ ,  $p = 0.0089$ , Figure 5A); 20% lower trabecular number (Tb.N, HFD:  
340  $3.73 \pm 0.23$  mm<sup>-1</sup> vs. CFD:  $4.64 \pm 0.54$  mm<sup>-1</sup>,  $p = 0.0010$ , Figure 5B); and 26% greater trabecular  
341 separation (Tb.Sp, HFD:  $262.4 \pm 18.4$  μm vs. CFD:  $208.5 \pm 21.0$  μm,  $p=0.0001$ , Figure 5C); but  
342 similar trabecular thickness (Tb.Th, HFD:  $51.3 \pm 6.6$  μm vs. CFD:  $50.1 \pm 3.6$  μm,  $p = 0.68$ , Figure  
343 5D). In addition, the connectivity density (Conn.D) of the trabecular network was 50% lower in  
344 the HFD group compared to the CFD group ( $p = 0.00053$ , Table 1), but the degree of anisotropy  
345 (DA) was not significantly different between HFD and CFD groups ( $p = 0.11$ , Table 1). HFD  
346 group had a 30% lower trabecular vBMD than CFD group ( $p = 0.0082$ ) but similar TMD ( $p =$   
347  $0.98$ ). Exercise did not significantly affect any of the metrics for trabecular bone microstructure.

348

349 While cancellous bone microstructure was substantially altered by HFD in the distal femoral  
350 metaphysis, cortical bone geometry remained similar between HFD and CFD in the distal  
351 metaphysis and diaphysis. In the femur, neither HFD nor exercise had a significant effect on  
352 cortical vBMD, cortical area (Ct.Ar), total area (Tt.Ar), cortical area fraction (Ct.Ar/Tt.Ar), or  
353 cortical thickness (Ct.Th) in either the cortical bone around the metaphyseal VOI or in the  
354 diaphyseal VOI (Table 1). Similarly, in the mid-diaphyseal VOI, neither HFD nor exercise affected  
355 medial-lateral moment of inertia ( $I_{ML}$ ,  $p = 0.25$  and  $p = 0.38$ , respectively) or anterior-posterior  
356 moment of inertia ( $I_{AP}$ ,  $p = 0.11$  and  $p = 0.28$ , respectively). Overall femur length was also similar  
357 across both diet ( $p = 0.17$ ) and exercise ( $p = 0.52$ ) groups (Table 1).

358

#### 359 *3.4 Cortical Bone Remodeling (Tibia)*

360 Dynamic indices of cortical bone remodeling from dynamic histomorphometry were similar in the  
361 HFD and CFD groups at both the endosteal and periosteal surfaces, with no significant differences  
362 in MS/BS, MAR, or BFR/BS (Table 2). Exercise, however, did significantly affect the extent of  
363 active remodeling bone surface, with 62% greater endosteal MS/BS compared to sedentary groups  
364 ( $p = 0.016$ ), but exercise did not affect endosteal MAR ( $p = 0.74$ ) or BFR/BS ( $p = 0.57$ ). The  
365 periosteal surface had little labeling, and neither HFD nor exercise had a significant effect on  
366 periosteal remodeling (Table 2).

367

#### 368 *3.5 Whole Bone, Apparent, and Tissue Mechanical Properties (Femur)*

369 HFD negatively affected whole bone mechanical properties in the femur measured by three-point  
370 bending (Figure 6, Table 3). Compared to the CFD group, the HFD group had 18% lower yield

371 load ( $p = 0.039$ ) and nearly lower ultimate load (14% lower,  $p = 0.058$ ) and stiffness (18% lower,  
372  $p = 0.055$ ). After accounting for body mass (ANCOVA), none of the mechanical properties  
373 differed between HFD and CFD groups, except whole bone stiffness tended to be lower in HFD  
374 compared to CFD even after body mass adjustments ( $p = 0.085$ , Table 3). Femoral length was  
375 similar across diet and exercise groups (Table 1), but when whole bone mechanical properties were  
376 adjusted for femur length (ANCOVA), none of the mechanical properties differed between HFD  
377 and CFD groups, except yield load was nearly lower in HFD compared to CFD ( $p = 0.082$ , Table  
378 3). Similarly, none of the estimated apparent-level material properties – yield stress, ultimate  
379 stress, and Young’s modulus – were significantly affected by HFD or exercise (Table 3). Cortical  
380 tissue material properties assessed with nanoindentation were also not significantly affected by  
381 HFD or exercise (Table 3). Both hardness and reduced modulus values were consistent across  
382 regions ( $p = 0.66$  and  $p = 0.42$ , respectively).

383

### 384 *3.6 Cortical Bone Composition (Femur)*

385 HFD had only a small effect on tissue composition as assessed by Raman spectroscopy (Figure 7),  
386 nearly reducing carbonate substitution by 2% in the mid-cortex ( $p = 0.080$ ) and by 3% along the  
387 periosteal edge ( $p = 0.083$ , Figure 7F). Exercise had more pronounced effects on cortical bone  
388 composition. Mineral maturity was nearly higher (2% greater phosphate crystallinity) for exercise  
389 groups compared to sedentary groups near the periosteal edge ( $p = 0.068$ , Figure 7A). Exercise did  
390 not affect mineral crystallinity in the mid-cortex ( $p = 0.81$ ) or near the endosteal edge ( $p = 0.20$ ).  
391 Mineral-to-matrix band intensity ratios near the endosteal edge were higher for exercise groups  
392 relative to sedentary groups for the phosphate/(proline+hydroxyproline) ratio (27% higher,  $p =$   
393 0.013, Figure 7B), phosphate/amide I ratio (18% higher,  $p = 0.030$ , Figure 7C), and

394 phosphate/amide III ratio (25% higher,  $p = 0.023$ , Figure 7D). Similarly, the carbonate-to-matrix  
395 ratio (carbonate/amide I) near the endosteal edge was also increased for exercise compared to  
396 sedentary (13% higher,  $p = 0.023$ , Figure 7E). Carbonate substitution was not affected by exercise  
397 in any region (Figure 7F).

398

### 399 *3.7 Osteovascular Structure (Femur)*

400 Osteovascular structure in the distal femoral metaphysis, as assessed by immunofluorescence, was  
401 not significantly affected by HFD or exercise (Table 4). Vessel area fraction (endomucin-positive  
402 blood vessels per total area) within the bone was similar HFD and CFD ( $p = 0.78$ ) and between  
403 exercise and sedentary ( $p = 0.51$ ) groups. Similarly, the average vessel-to-bone distance between  
404 endomucin-positive blood vessels and collagen type I-positive bone surfaces did not differ  
405 between HFD and CFD ( $p = 0.44$ ) or between exercise and sedentary ( $p = 0.15$ ). Bone surface area  
406 fraction (col-1-positive bone area per total area) was 32% lower in the HFD group compared to  
407 the CFD group ( $p = 0.034$ , Table 4), consistent with the reduced BV/TV noted above. Exercise did  
408 not affect col-1-positive bone surface area fraction ( $p = 0.51$ ), also consistent with BV/TV results.

409

### 410 *3.8 Osteovascular Crosstalk (Serum)*

411 Crosstalk between endothelial cells and osteoblasts, as assessed by serum ELISA, was not affected  
412 by HFD or exercise (Table 5). At the end of the study, serum concentrations were similar between  
413 HFD and CFD groups ( $p = 0.27$  for BMP2 and  $p = 0.89$  for VEGF-A) and also between exercise  
414 and sedentary groups ( $p = 0.36$  for BMP2 and  $p = 0.43$  for VEGF-A).

415

416

#### 417 **4 Discussion**

418 High fat diet-induced obesity reduced whole bone bending strength in the femur, without altering  
419 cortical bone mineral density, geometry, or apparent- or tissue-level material properties relative to  
420 control fat diet. Because bone strength depends on these parameters,<sup>(9,10)</sup> we expected one of them  
421 to be altered by HFD to explain the underlying cause for the relative strength deficits in that group.  
422 The reductions in bending properties with HFD were no longer significant after adjusting for body  
423 size, by including either body mass (yield and ultimate load) or femur length (ultimate load and  
424 stiffness) as a covariate. Although femur length was not significantly different between HFD and  
425 CFD groups, variations in body size seems to account for diet-related strength differences, as was  
426 also reported in a recent study where the magnitude of the effects of HFD on cortical area and  
427 bending strength were reduced after accounting for body mass.<sup>(48)</sup> HFD had deleterious effects on  
428 cancellous bone microstructure in the distal femur, with reduced bone volume due to loss of  
429 trabeculae, which reduces bone strength to a much greater extent compared to trabecular  
430 thinning.<sup>(49)</sup> Therefore, bone strength at primarily cancellous bone sites, like vertebrae, may also  
431 be reduced with HFD, as was demonstrated in the mouse L3 vertebra after HFD<sup>(15)</sup> and the rat L6  
432 vertebra after high sucrose diet induced-obesity.<sup>(50)</sup> HFD did not alter osteovasculature in  
433 cancellous sites, with no differences in bone perfusion (proximal tibia) or vascular area and  
434 proximity to bone surfaces (distal femur) relative to CFD. This work reveals that HFD negatively  
435 affects cancellous bone microstructure without affecting vessel area, and cortical bone strength  
436 without affecting cortical geometry or material properties, and only slight changes to tissue  
437 composition.

438

439 HFD created an obese, hyperglycemic phenotype that persisted with daily treadmill exercise. After  
440 9 weeks of diet, HFD groups were heavier than CFD groups, and after 13 weeks of diet, HFD  
441 groups had significantly lower glucose tolerance and weekly fasting serum glucose concentrations  
442 that were over 200 mg/dL, indicative of pre-diabetes.<sup>(51)</sup> Although exercise had transient benefits  
443 to glucose tolerance in the HFD group, these benefits did not persist to the end of the study at  
444 Week 17, and daily treadmill exercise did not mitigate the negative effects of HFD on cancellous  
445 bone microstructure. Exercise had no effect on femoral cortical mechanical properties at the whole  
446 bone, apparent, or tissue levels, despite slightly increasing mineral-to-matrix ratios in the  
447 diaphysis. Exercise, but not HFD, increased the extent of active remodeling bone surface in the  
448 tibial diaphysis and bone perfusion in the proximal tibia but had no effect on the relative amount  
449 of blood vessels or the distance between blood vessels and bone surfaces in the distal femur.

450  
451 High fat diet negatively affected cancellous, but not cortical, bone structure in the femur. Our  
452 reductions in cancellous microstructure and bone surface area in the distal femur with 60% fat diet  
453 from age 5-23 weeks are consistent with results from several other studies, which also reported  
454 cancellous bone degradation following HFD in young male C57Bl/6J mice. Compared to mice fed  
455 a control fat diet, mice fed a high fat diet (either 45% or 60% fat) from 3-6 weeks of age to 15-28  
456 weeks of age experienced 18-49% reductions in cancellous bone volume fraction<sup>(12,14,15,17,52)</sup> and  
457 10-18% reductions in trabecular number<sup>(13,15)</sup> in the distal femoral metaphysis. Conversely, a 60%  
458 HFD from 7-28 weeks of age induced a 14% increase in trabecular cross-sectional area in the distal  
459 femur relative to CFD, but the measurements were obtained using peripheral quantitative  
460 computed tomography with a large voxel size (70 x 70 x 500  $\mu\text{m}$ ).<sup>(53)</sup> Most studies have been  
461 performed in young, male mice, though a couple of studies found similar reductions in BV/TV in

462 diets started after skeletal maturity was reached. A study comparing extended HFD from 7-28  
463 weeks of age to short-term HFD from 25-28 weeks of age found a 19% decrease in cancellous  
464 BV/TV in the distal femoral metaphysis with extended HFD and a 12% decrease with short-term  
465 HFD.<sup>(12)</sup> Similarly, a study comparing 60% HFD from 5-17 weeks of age (young) to HFD from  
466 20-32 weeks of age (mature) found, compared to CFD mice of the same age, a 45% decrease in  
467 BV/TV in the distal femoral metaphysis in young mice and a 29% decrease in mature mice.<sup>(15)</sup>  
468 These studies demonstrate that diet-induced obesity in male mice commonly leads to detrimental  
469 changes in cancellous bone microstructure, as we report here, and suggest that altered modeling  
470 during skeletal growth is not solely responsible for the negative HFD effects on microstructure.

471  
472 The effects of HFD on cortical bone geometry in male C57Bl/6J mice are less consistent. Similar  
473 to our results, several groups report no effect on cortical bone parameters,<sup>(13,14,16,54)</sup> but the study  
474 that reported increased trabecular cross-sectional area also found a 7% increase in cortical area in  
475 the diaphysis and a 21% increase in polar moment of inertia (pMOI) relative to CFD.<sup>(53)</sup> Similarly,  
476 a 60% fat diet from 4-23 weeks of age resulted in an 11% increase in both diaphyseal Ct.Th and  
477 Ct.Ar relative to CFD,<sup>(18)</sup> while a 60% fat diet from 6-18 weeks resulted in slightly expanded  
478 diaphyseal marrow area, lower Ct.Th, and similar pMOI relative to CFD.<sup>(17)</sup> More research is  
479 required to determine specific underlying factors that may be contributing to this variability in  
480 HFD-induced effects on cortical bone structure, and whether these factors may help explain our  
481 reduced femoral strength. In particular, cortical porosity, which we could not examine at the  
482 resolution of our micro-CT scans, can impact bone strength,<sup>(55,56)</sup> and changes in cortical porosity  
483 with HFD are understudied. Two HFD studies have reported porosity measured with micro-CT  
484 using voxel sizes between 10-12  $\mu\text{m}$ ,<sup>(13,57)</sup> but accurately measuring cortical porosity requires a

485 higher resolution with a voxel size of 1-2  $\mu\text{m}$ , particularly for small animals.<sup>(58)</sup> To our knowledge  
486 only one study has examined porosity at this appropriate resolution, and they found that porosity  
487 measured with a 2- $\mu\text{m}$  voxel size was up to 37% lower than porosity measured with a 1- $\mu\text{m}$  voxel  
488 size, and that HFD reduced vascular canal porosity by 33% relative to CFD.<sup>(59)</sup>

489  
490 HFD decreased whole bone mechanical properties in the femur, with 18% lower yield load, 14%  
491 lower ultimate load, and 18% lower stiffness in three-point bending compared to CFD. Other  
492 groups have also reported reduced femur bending properties for young male C57B/6J mice.  
493 Studies with HFD beginning at 3-6 weeks of age and ending at 19-28 weeks of age reported a 12%  
494 reduction in maximum load,<sup>(19)</sup> 29% reduction in ultimate load, and 20% reduction in stiffness.<sup>(52)</sup>  
495 Similar results have also been reported in the L3 vertebra, with mice fed a 60% HFD from 5-17  
496 weeks of age (young) or from 20-32 weeks of age (mature) having 17-24% lower yield load, 16-  
497 26% lower maximum load, and 21-27% lower stiffness during compressive loading in both age  
498 groups compared to age-matched mice fed a CFD.<sup>(15)</sup> Conversely, in a study of cantilever bending  
499 in the femoral neck, the HFD group (60% fat diet from 7-28 weeks of age) had 18% higher  
500 maximum load and 29% higher bending modulus compared to the CFD group.<sup>(53)</sup>

501  
502 Despite reductions in whole bone mechanical properties, we found no changes in estimated  
503 apparent-level material properties with HFD. The study with reduced maximum force and stiffness  
504 in the L3 vertebra also found no significant changes in apparent-level material properties in either  
505 young or old HFD mice compared to age-matched CFD.<sup>(15)</sup> Other groups have reported either  
506 reduced or increased apparent-level material properties for HFD vs. CFD in male C57B/6J mice.  
507 For whole femurs in three-point bending, two studies found that HFD (60% fat diet starting from



508 3-6 weeks-of-age to 19-28 weeks of age) caused 19-32% lower apparent elastic modulus, 15-26%  
509 lower maximum stress, and 24% lower yield stress,<sup>(18,19)</sup> while another study found 44% higher  
510 apparent elastic modulus.<sup>(52)</sup> Tissue-level material properties were also unaltered by HFD in our  
511 study. To our knowledge, no previous study has examined the effects of HFD on tissue-level  
512 material properties. Since we did not find HFD-induced changes in bone density, structure, or  
513 tissue-level properties, the reduced whole bone strength may result from a combination of small  
514 changes in several parameters that were not statistically significant in this study.

515  
516 Cortical tissue composition in the femur was altered by exercise, with increased mineral-to-matrix  
517 and carbonate-to-matrix ratios near the endosteal edge and increased mineral maturity near the  
518 periosteal edge. Mineralization of new bone tissue occurs slowly, so higher mineral-to-matrix and  
519 carbonate-to-matrix ratios are associated with older bone that is generally harder and stiffer.<sup>(45,60)</sup>  
520 However, a study using the same treadmill regimen initiated at 16 weeks of age found that  
521 treadmill exercise increased ultimate strain and the mineral-to-matrix ratio of phosphate  $\nu_1$  to  
522 summed proline and hydroxyproline without affecting tibial morphology, suggesting increased  
523 mineral-to-matrix ratios could be a mechanism by which bone adapts to exercise to maintain local  
524 functional strain.<sup>(61)</sup> Other studies have used Raman spectroscopy to analyze the increased  
525 accumulation of advanced glycation end-products (AGEs), known to cause material differences  
526 that increase fracture risk,<sup>(52,62-64)</sup> in rodent diabetic bone. Elevated glucose may lead to AGE  
527 accumulation in collagen,<sup>(62,65)</sup> which has been shown to increase resistance to plastic deformation  
528 and stiffness at the material level in bone.<sup>(64,66)</sup> A recent study in HFD mice (60% fat from 8-30  
529 weeks of age) found no difference in mineral-to-matrix ratio, crystallinity, or carbonate  
530 substitution compared to CFD, but an increased amount of the AGE pentosidine (PEN), which was

531 positively correlated with higher bending modulus despite lower stiffness and ultimate load.<sup>(52)</sup>  
532 However, the Raman spectra in our study did not contain any of these AGE bands, indicating  
533 AGEs were not significantly present.

534

535 This study found no effect of HFD or exercise on 2D osteovascular structure (vessel area and  
536 proximity to bone surfaces) in the distal femur, but stereological methods are not ideal for  
537 measuring complex three-dimensional structures like the branching network of blood vessels,<sup>(67)</sup>  
538 so HFD may have affected osteovascular parameters that are not quantifiable with stereology.  
539 Similar to our results, a recent study reported no HFD-related changes in the 3D vessel network in  
540 the proximal tibia using a new contrast agent with micro-CT.<sup>(68)</sup> Specifically, HFD from 8-30  
541 weeks of age did not affect the vessel volume per medullary volume or the distance between blood  
542 vessels and bone surfaces compared to CFD. However, this study also reported that HFD reduced  
543 the number of blood vessels by 3.9-fold and increased average vessel diameter by 2.7-fold, metrics  
544 that cannot be accurately quantified with stereological techniques.

545

546 Perfusion is a functional measure of blood supply to tissue that incorporates not only the amount  
547 of blood vessels but also the velocity and direction of the blood flow in the vessels, as well as  
548 vessel permeability and diameter.<sup>(69)</sup> For example, if HFD increased vessel diameter but reduced  
549 vessel number compared to CFD, these changes could offset each other and result in the same  
550 perfusion measurement. Similarly, the increased perfusion observed with exercise may result from  
551 other structural changes to the vascular network besides vessel area and proximity to bone surfaces,  
552 which were similar between sedentary and exercise groups. Furthermore, bone perfusion likely  
553 experiences temporal changes in response to interventions like HFD and exercise; however, it was

554 only measured at the end of the study to avoid causing inflammation in the hindlimb, as  
555 recommended by the group that developed the method for assessing perfusion in mouse tibiae.<sup>(34)</sup>  
556  
557 Diet-induced obesity has far-reaching physiological effects that can impact bone health and may  
558 be responsible for the observed envelope-specific changes to cancellous but not cortical bone  
559 structure. In this study, HFD led to the development of obesity and pre-diabetic levels of elevated  
560 serum glucose, both of which impact metabolic pathways that influence bone metabolism.  
561 Elevated glucose concentrations are associated with reduced BMD in rats and humans,<sup>(70,71)</sup> as  
562 well as *in vitro* proliferation and mineralization of osteoblasts.<sup>(65,72,73)</sup> Obesity in humans and HFD-  
563 induced obesity mouse models are associated with increases in both leptin and glucocorticoids,  
564 which differentially affect cortical and cancellous bone envelopes.<sup>(74-77)</sup> Leptin, which signals  
565 satiety, also promotes the maintenance of bone mass; when the leptin receptor is knocked out  
566 globally in mice they become obese, even without HFD, and gain cortical bone but lose cancellous  
567 bone.<sup>(77)</sup> Mice with conditional knockout of the leptin receptor in bone marrow stromal cells,  
568 however, do not become obese without HFD. With 12 weeks of HFD, the conditional knockout  
569 prevented detrimental cancellous microstructure changes and decreased the number of  
570 mesenchymal stem cells (MSC) that differentiated into adipocytes compared to wild-type mice,  
571 suggesting obesity affects bone maintenance directly through leptin.<sup>(78)</sup> Corticosterone, a  
572 glucocorticoid in rodents, is associated with increased bone resorption, but in growing mice the  
573 effect is bone- and site-specific, tending to increase endosteal resorption while preventing  
574 periosteal remodeling and leading to an expanded marrow cavity.<sup>(76)</sup> Unlike leptin, the effect of  
575 obesity on increased serum glucocorticoids in either rodents or humans is unclear.<sup>(75,79)</sup> Lastly,  
576 increased amounts of marrow adipose tissue (MAT) may negatively affect cancellous bone

577 structure. We did not quantify MAT in this study, but other groups report dramatic increases in the  
578 amount of metaphyseal MAT with HFD,<sup>(13,24-27)</sup> and decreased MAT with intense exercise.<sup>(24,25)</sup>  
579 Moderate treadmill exercise did not affect bone microstructure in this study, but other studies that  
580 utilize more intense exercise regimen, such as free access to running wheel<sup>(24,25,53,80)</sup> or high  
581 intensity treadmill training,<sup>(81)</sup> found effects of exercise in HFD mice.

582

583 In conclusion, our study demonstrated that high fat diet-induced obesity caused detriments to  
584 cancellous bone microstructure and whole bone bending strength in the femur that were not  
585 concomitant with changes to metaphyseal perfusion or vascularity, or to cortical geometry or tissue  
586 properties. We also showed that moderate treadmill activity did not reverse the deleterious effects  
587 of HFD, increase intraosseous vascularity, or increase mechanical properties in this model.  
588 Exercise did, however, increase intraosseous perfusion in the tibia, and stimulate changes to tissue  
589 composition in the femur, without affecting geometry. These findings should be examined further  
590 by characterizing changes to intraosseous perfusion at different timepoints during the development  
591 of HFD, and by incorporating more intense exercise routines.

592

## 593 **Acknowledgments**

594 We thank the following individuals for expertise and contributions to data collection: Eric  
595 Livingston and Dr. Ted Bateman (micro-CT); Keith Jones, Daniel Chester, and Dr. Ashley Brown  
596 (atomic force microscopy); Sandra Horton and Dr. Denis Marcellin-Little (histology); Sara  
597 Chopra, Nicholas Rinz, Dr. Roberto Garcia, Dr. Chuanzhen Elaine Zhou, and Dr. Fred Stevie  
598 (sample preparation, Raman spectroscopy); Dr. Eva Johannes (confocal fluorescence microscopy).

599

600 Research was supported by the Eunice Kennedy Shriver National Institute of Child Health and  
601 Human Development (NICHD) of the NIH under award number K12HD073945. The content is  
602 solely the responsibility of the authors and does not necessarily represent the official views of the  
603 NIH. This work was performed in part at the Analytical Instrumentation Facility (AIF) at North  
604 Carolina State University, which is supported by the State of North Carolina and the National  
605 Science Foundation (award number ECCS-1542015). The AIF is a member of the North Carolina  
606 Research Triangle Nanotechnology Network (RTNN), a site in the National Nanotechnology  
607 Coordinated Infrastructure (NNCI). The authors acknowledge the use of the Cellular and  
608 Molecular Imaging Facility (CMIF) at North Carolina State University, which is supported by the  
609 State of North Carolina and the National Science Foundation.

610

611 Authors' roles: Study design: NH, AS, and JHC. Animal work: NH, AS, and EE. Data collection:  
612 NH, AS, JMC, EE, HT, MS, and SV. Data analysis: NH, AS, JMC, MS, and HT. Data  
613 interpretation: NH, AS, and JHC. Drafting and revising manuscript: NH, AS, JMC, and JHC.  
614 Approving final version of manuscript: NH, AS, JMC, EE, HT, MS, SV, and JHC. JHC takes  
615 responsibility for the integrity of the data analysis.

616

## 617 **References**

- 618 1. Ng M, Fleming T, Robinson M, Thomson B, Graetz N, Margono C, Mullany EC, Biryukov  
619 S, Abbafati C, Abera SF, Abraham JP, Abu-Rmeileh NME, Achoki T, AlBuhairan FS,  
620 Alemu ZA, Alfonso R, Ali MK, Ali R, Guzman NA, Ammar W, Anwari P, Banerjee A,  
621 Barquera S, Basu S, Bennett DA, Bhutta Z, Blore J, Cabral N, Nonato IC, Chang J-C,  
622 Chowdhury R, Courville KJ, Criqui MH, Cundiff DK, Dabhadkar KC, Dandona L, Davis  
623 A, Dayama A, Dharmaratne SD, Ding EL, Durrani AM, Esteghamati A, Farzadfar F, Fay  
624 DFJ, Feigin VL, Flaxman A, Forouzanfar MH, Goto A, Green MA, Gupta R, Hafezi-Nejad  
625 N, Hankey GJ, Harewood HC, Havmoeller R, Hay S, Hernandez L, Husseini A, Idrisov BT,  
626 Ikeda N, Islami F, Jahangir E, Jassal SK, Jee SH, Jeffreys M, Jonas JB, Kabagambe EK,  
627 Khalifa SEAH, Kengne AP, Khader YS, Khang Y-H, Kim D, Kimokoti RW, Kinge JM,  
628 Kokubo Y, Kosen S, Kwan G, Lai T, Leinsalu M, Li Y, Liang X, Liu S, Logroscino G,  
629 Lotufo PA, Lu Y, Ma J, Mainoo NK, Mensah GA, Merriman TR, Mokdad AH,  
630 Moschandreas J, Naghavi M, Naheed A, Nand D, Narayan KMV, Nelson EL, Neuhouser  
631 ML, Nisar MI, Ohkubo T, Oti SO, Pedroza A, Prabhakaran D, Roy N, Sampson U, Seo H,  
632 Sepanlou SG, Shibuya K, Shiri R, Shiue I, Singh GM, Singh JA, Skirbekk V, Stapelberg  
633 NJC, Sturua L, Sykes BL, Tobias M, Tran BX, Trasande L, Toyoshima H, van de Vijver S,  
634 Vasankari TJ, Veerman JL, Velasquez-Melendez G, Vlassov VV, Vollset SE, Vos T, Wang  
635 C, Wang X, Weiderpass E, Werdecker A, Wright JL, Yang YC, Yatsuya H, Yoon J, Yoon  
636 S-J, Zhao Y, Zhou M, Zhu S, Lopez AD, Murray CJL, Gakidou E. Global, regional, and  
637 national prevalence of overweight and obesity in children and adults during 1980–2013: a  
638 systematic analysis for the Global Burden of Disease Study 2013. *The Lancet*. 2014 Sep  
639 5;384(9945):766–81.

- 640 2. Turner CH. Biomechanics of Bone: Determinants of Skeletal Fragility and Bone Quality.  
641 Osteoporos. Int. 2002 Feb 1;13(2):97–104.
- 642 3. Marshall D, Johnell O, Wedel H. Meta-Analysis Of How Well Measures Of Bone Mineral  
643 Density Predict Occurrence Of Osteoporotic Fractures. BMJ. 1996;312(7041):1254–9.
- 644 4. Laet CD, Kanis JA, Odén A, Johanson H, Johnell O, Delmas P, Eisman JA, Kroger H,  
645 Fujiwara S, Garnero P, McCloskey EV, Mellstrom D, Melton LJ, Meunier PJ, Pols H a. P,  
646 Reeve J, Silman A, Tenenhouse A. Body mass index as a predictor of fracture risk: A meta-  
647 analysis. Osteoporos. Int. 2005 Jun 1;16(11):1330–8.
- 648 5. Gonnelli S, Caffarelli C, Nuti R. Obesity and fracture risk. Clin. Cases Miner. Bone Metab.  
649 2014;11(1):9–14.
- 650 6. Edelstein SL, Barrett-Connor E. Relation between Body Size and Bone Mineral Density in  
651 Elderly Men and Women. Am. J. Epidemiol. 1993 Aug 1;138(3):160–9.
- 652 7. Sornay-Rendu E, Boutroy S, Vilayphiou N, Claustrat B, Chapurlat RD. In Obese  
653 Postmenopausal Women, Bone Microarchitecture and Strength Are Not Commensurate to  
654 Greater Body Weight: The Os des Femmes de Lyon (OFELY) Study. J. Bone Miner. Res.  
655 2013;28(7):1679–87.
- 656 8. Compston JE, Watts NB, Chapurlat R, Cooper C, Boonen S, Greenspan S, Pfeilschifter J,  
657 Silverman S, Díez-Pérez A, Lindsay R, Saag KG, Netelenbos JC, Gehlbach S, Hooven FH,  
658 Flahive J, Adachi JD, Rossini M, LaCroix AZ, Roux C, Sambrook PN, Siris ES. Obesity Is  
659 Not Protective against Fracture in Postmenopausal Women: GLOW. Am. J. Med. 2011  
660 Nov;124(11):1043–50.
- 661 9. Cole JH, Meulen MCH van der. Whole Bone Mechanics and Bone Quality. Clin. Orthop.  
662 Relat. Res. 2011 Jan 28;469(8):2139–49.

- 663 10. van der Meulen MCH, Jepsen KJ, Mikić B. Understanding bone strength: size isn't  
664 everything. *Bone*. 2001 Aug;29(2):101–4.
- 665 11. Sundh D, Rudäng R, Zoulakis M, Nilsson AG, Darelid A, Lorentzon M. A High Amount of  
666 Local Adipose Tissue Is Associated With High Cortical Porosity and Low Bone Material  
667 Strength in Older Women. *J. Bone Miner. Res.* 2016;31(4):749–57.
- 668 12. Patsch JM, Kiefer FW, Varga P, Pail P, Rauner M, Stupphann D, Resch H, Moser D, Zysset  
669 PK, Stulnig TM, Pietschmann P. Increased bone resorption and impaired bone  
670 microarchitecture in short-term and extended high-fat diet–induced obesity. *Metabolism*.  
671 2011 Feb;60(2):243–9.
- 672 13. Doucette CR, Horowitz MC, Berry R, MacDougald OA, Anunciado-Koza R, Koza RA,  
673 Rosen CJ. A High Fat Diet Increases Bone Marrow Adipose Tissue (MAT) But Does Not  
674 Alter Trabecular or Cortical Bone Mass in C57BL/6J Mice. *J. Cell. Physiol.* 2015  
675 Sep;230(9):2032–7.
- 676 14. Cao JJ, Sun L, Gao H. Diet-induced obesity alters bone remodeling leading to decreased  
677 femoral trabecular bone mass in mice. *Ann. N. Y. Acad. Sci.* 2010 Apr 1;1192(1):292–7.
- 678 15. Inzana JA, Kung M, Shu L, Hamada D, Xing LP, Zuscik MJ, Awad HA, Mooney RA.  
679 Immature mice are more susceptible to the detrimental effects of high fat diet on cancellous  
680 bone in the distal femur. *Bone*. 2013 Nov 1;57(1):174–83.
- 681 16. Cao JJ, Gregoire BR, Gao H. High-fat diet decreases cancellous bone mass but has no  
682 effect on cortical bone mass in the tibia in mice. *Bone*. 2009 Jun 1;44(6):1097–104.
- 683 17. Baek K, Hwang HR, Park H-J, Kwon A, Qadir AS, Ko S-H, Woo KM, Ryoo H-M, Kim G-  
684 S, Baek J-H. TNF- $\alpha$  Upregulates Sclerostin Expression in Obese Mice Fed a High-Fat Diet.  
685 *J. Cell. Physiol.* 2014 May 1;229(5):640–50.



- 686 18. Ionova-Martin SS, Do SH, Barth HD, Szadkowska M, Porter AE, Ager JW, Ager JW,  
687 Alliston T, Vaisse C, Ritchie RO. Reduced size-independent mechanical properties of  
688 cortical bone in high-fat diet-induced obesity. *Bone*. 2010 Jan 1;46(1):217–25.
- 689 19. Ionova-Martin SS, Wade JM, Tang S, Shahnazari M, Ager JW, Lane NE, Yao W, Alliston  
690 T, Vaisse C, Ritchie RO. Changes in cortical bone response to high-fat diet from  
691 adolescence to adulthood in mice. *Osteoporos. Int*. 2011 Aug 1;22(8):2283–93.
- 692 20. Crandall DL, Hausman GJ, Kral JG. A review of the microcirculation of adipose tissue:  
693 anatomic, metabolic, and angiogenic perspectives. *Microcirculation*. 1997;4(2):211–232.
- 694 21. Bråkenhielm E, Cao R, Gao B, Angelin B, Cannon B, Parini P, Cao Y. Angiogenesis  
695 Inhibitor, TNP-470, Prevents Diet-Induced and Genetic Obesity in Mice. *Circ. Res*. 2004  
696 Jun 25;94(12):1579–88.
- 697 22. Rupnick MA, Panigrahy D, Zhang C-Y, Dallabrida SM, Lowell BB, Langer R, Folkman  
698 MJ. Adipose tissue mass can be regulated through the vasculature. *Proc. Natl. Acad. Sci*.  
699 2002 Aug 6;99(16):10730–5.
- 700 23. Schipani EMD, Wu CPD, Rankin EBPD, Giaccia AJPD. Regulation of bone marrow  
701 angiogenesis by osteoblasts during bone development and homeostasis. *Bone Res*.  
702 2013;4:85.
- 703 24. Styner M, Pagnotti GM, McGrath C, Wu X, Sen B, Uzer G, Xie Z, Zong X, Styner MA,  
704 Rubin CT, Rubin J. Exercise Decreases Marrow Adipose Tissue Through  $\beta$ -Oxidation in  
705 Obese Running Mice. *J. Bone Miner. Res*. 2017 Aug 1;32(8):1692–702.
- 706 25. Styner M, Thompson WR, Galior K, Uzer G, Wu X, Kadari S, Case N, Xie Z, Sen B,  
707 Romaine A, Pagnotti GM, Rubin CT, Styner MA, Horowitz MC, Rubin J. Bone marrow fat

- 708 accumulation accelerated by high fat diet is suppressed by exercise. *Bone*. 2014 Jul  
709 1;64:39–46.
- 710 26. Scheller EL, Khoury B, Moller KL, Wee NKY, Khandaker S, Kozloff KM, Abrishami SH,  
711 Zamarron BF, Singer K. Changes in Skeletal Integrity and Marrow Adiposity during High-  
712 Fat Diet and after Weight Loss. *Front. Endocrinol.* [Internet]. 2016 [cited 2019 Mar 3];7.  
713 Available from: <https://www.frontiersin.org/articles/10.3389/fendo.2016.00102/full>
- 714 27. Tencerova M, Figeac F, Ditzel N, Taipaleenmäki H, Nielsen TK, Kassem M. High-Fat  
715 Diet–Induced Obesity Promotes Expansion of Bone Marrow Adipose Tissue and Impairs  
716 Skeletal Stem Cell Functions in Mice. *J. Bone Miner. Res.* 2018 Jun 1;33(6):1154–65.
- 717 28. Li FYL, Cheng KKY, Lam KSL, Vanhoutte PM, Xu A. Cross-talk between adipose tissue  
718 and vasculature: role of adiponectin. *Acta Physiol.* 2011 Sep 1;203(1):167–80.
- 719 29. Barou O, Mekraldi S, Vico L, Boivin G, Alexandre C, Lafage-Proust MH. Relationships  
720 between trabecular bone remodeling and bone vascularization: a quantitative study. *Bone*.  
721 2002 Apr;30(4):604–12.
- 722 30. Kristensen HB, Andersen TL, Marcussen N, Rolighed L, Delaisse J-M. Increased presence  
723 of capillaries next to remodeling sites in adult human cancellous bone. *J. Bone Miner. Res.*  
724 2013 Mar 1;28(3):574–85.
- 725 31. Prisby R, Guignandon A, Vanden-Bossche A, Mac-Way F, Linossier M-T, Thomas M,  
726 Laroche N, Malaval L, Langer M, Peter Z-A, Peyrin F, Vico L, Lafage-Proust M-H.  
727 Intermittent PTH(1–84) is osteoanabolic but not osteoangiogenic and relocates bone  
728 marrow blood vessels closer to bone-forming sites. *J. Bone Miner. Res.* 2011 Nov  
729 1;26(11):2583–96.

- 730 32. Yao Z, Lafage-Proust M-H, Plouët J, Bloomfield S, Alexandre C, Vico L. Increase of Both  
731 Angiogenesis and Bone Mass in Response to Exercise Depends on VEGF. *J. Bone Miner.*  
732 *Res.* 2004 Sep 1;19(9):1471–80.
- 733 33. Kempen DHR, Lu L, Heijink A, Hefferan TE, Creemers LB, Maran A, Yaszemski MJ,  
734 Dhert WJA. Effect of local sequential VEGF and BMP-2 delivery on ectopic and orthotopic  
735 bone regeneration. *Biomaterials.* 2009 May;30(14):2816–25.
- 736 34. Roche B, Vanden-Bossche A, Normand M, Malaval L, Vico L, Lafage-Proust M-H.  
737 Validated Laser Doppler protocol for measurement of mouse bone blood perfusion —  
738 Response to age or ovariectomy differs with genetic background. *Bone.* 2013  
739 Aug;55(2):418–26.
- 740 35. Hanne NJ, Easter ED, Cole JH. Validating Minimally Invasive Laser Doppler Flowmetry  
741 for Serial Bone Perfusion Measurements in Mice. *bioRxiv.* 2019 Jul 19;708412.
- 742 36. Bouxsein ML, Boyd SK, Christiansen BA, Guldberg RE, Jepsen KJ, Müller R. Guidelines  
743 for assessment of bone microstructure in rodents using micro-computed tomography. *J.*  
744 *Bone Miner. Res.* 2010 Jul 1;25(7):1468–86.
- 745 37. Smith L, Bigelow EMR, Jepsen KJ. Systematic evaluation of skeletal mechanical function.  
746 *Curr. Protoc. Mouse Biol.* 2013 Jun;3:39–67.
- 747 38. Dempster DW, Compston JE, Drezner MK, Glorieux FH, Kanis JA, Malluche H, Meunier  
748 PJ, Ott SM, Recker RR, Parfitt AM. Standardized nomenclature, symbols, and units for  
749 bone histomorphometry: A 2012 update of the report of the ASBMR Histomorphometry  
750 Nomenclature Committee. *J. Bone Miner. Res.* 2013 Jan 1;28(1):2–17.
- 751 39. Egan KP, Brennan TA, Pignolo RJ. Bone histomorphometry using free and commonly  
752 available software. *Histopathology.* 2012 Dec;61(6):1168–73.

- 753 40. Jepsen KJ, Silva MJ, Vashishth D, Guo XE, van der Meulen MC. Establishing  
754 Biomechanical Mechanisms in Mouse Models: Practical Guidelines for Systematically  
755 Evaluating Phenotypic Changes in the Diaphyses of Long Bones. *J. Bone Miner. Res.* 2015  
756 Jun 1;30(6):951–66.
- 757 41. Turner CH, Burr DB. Basic biomechanical measurements of bone: a tutorial. *Bone.*  
758 1993;14(4):595–608.
- 759 42. Donnelly E, Baker SP, Boskey AL, van der Meulen MCH. Effects of surface roughness and  
760 maximum load on the mechanical properties of cancellous bone measured by  
761 nanoindentation. *J. Biomed. Mater. Res. A.* 2006 May;77(2):426–35.
- 762 43. Guss JD, Taylor E, Rouse Z, Roubert S, Higgins CH, Thomas CJ, Baker S, Vashishth D,  
763 Donnelly E, Shea MK, Booth SL, Bicalho RL, Hernandez C. The Microbial Metagenome  
764 and Tissue Composition in Mice with Microbiome-Induced Reductions in Bone Strength.  
765 *bioRxiv.* 2019 Mar 1;562058.
- 766 44. Oliver WC, Pharr GM. An improved technique for determining hardness and elastic  
767 modulus using load and displacement sensing indentation experiments. *J. Mater. Res.* 1992  
768 Jun;7(6):1564–83.
- 769 45. Morris MD, Mandair GS. Raman Assessment of Bone Quality. *Clin. Orthop. Relat. Res.*  
770 2011 Aug 1;469(8):2160–9.
- 771 46. Gamsjaeger S, Masic A, Roschger P, Kazanci M, Dunlop JWC, Klaushofer K, Paschalis  
772 EP, Fratzl P. Cortical bone composition and orientation as a function of animal and tissue  
773 age in mice by Raman spectroscopy. *Bone.* 2010 Aug 1;47(2):392–9.

- 774 47. Kusumbe AP, Ramasamy SK, Starsichova A, Adams RH. Sample preparation for high-  
775 resolution 3D confocal imaging of mouse skeletal tissue. *Nat. Protoc. Lond.* 2015  
776 Dec;10(12):1904–14.
- 777 48. Silva MJ, Eekhoff JD, Patel T, Kenney-Hunt JP, Brodt MD, Steger-May K, Scheller EL,  
778 Cheverud JM. Effects of High-Fat Diet and Body Mass on Bone Morphology and  
779 Mechanical Properties in 1100 Advanced Intercross Mice. *J. Bone Miner. Res.*  
780 2019;34(4):711–25.
- 781 49. Silva MJ, Gibson LJ. Modeling the mechanical behavior of vertebral trabecular bone:  
782 effects of age-related changes in microstructure. *Bone.* 1997 Aug;21(2):191–9.
- 783 50. Zernicke RF, Salem GJ, Barnard RJ, Schramm E. Long-term, high-fat-sucrose diet alters rat  
784 femoral neck and vertebral morphology, bone mineral content, and mechanical properties.  
785 *Bone.* 1995 Jan 1;16(1):25–31.
- 786 51. Surwit RS, Kuhn CM, Cochrane C, McCubbin JA, Feinglos MN. Diet-Induced Type II  
787 Diabetes in C57BL/6J Mice. *Diabetes.* 1988 Sep 1;37(9):1163–7.
- 788 52. Marin C, Papantonakis G, Sels K, van Lenthe GH, Falgayrac G, Vangoitsenhoven R, Van  
789 der Schueren B, Penel G, Luyten F, Vandamme K, Kerckhofs G. Unraveling the  
790 compromised biomechanical performance of type 2 diabetes- and Roux-en-Y gastric bypass  
791 bone by linking mechanical-structural and physico-chemical properties. *Sci. Rep. Nat. Publ.*  
792 *Group Lond.* 2018 Apr;8:1–12.
- 793 53. Ma H, Torvinen S, Silvennoinen M, Rinnankoski-Tuikka R, Kainulainen H, Morko J, Peng  
794 Z, Kujala UM, Rahkila P, Suominen H. Effects of diet-induced obesity and voluntary wheel  
795 running on bone properties in young male C57BL/6J mice. *Calcif. Tissue Int.* 2010  
796 May;86(5):411-9.

- 797 54. Li Z, Hardij J, Evers SS, Hutch CR, Choi SM, Shao Y, Learman BS, Lewis KT, Schill RL,  
798 Mori H, Bagchi DP, Romanelli SM, Kim K-S, Bowers E, Griffin C, Seeley RJ, Singer K,  
799 Sandoval DA, Rosen CJ, MacDougald OA. G-CSF partially mediates effects of sleeve  
800 gastrectomy on the bone marrow niche. *J. Clin. Invest.* 2019 Jun 3;129(6):2404–16.
- 801 55. Yeni YN, Brown CU, Wang Z, Norman TL. The influence of bone morphology on fracture  
802 toughness of the human femur and tibia. *Bone.* 1997 Nov 1;21(5):453–9.
- 803 56. Wachter NJ, Krischak GD, Mentzel M, Sarkar MR, Ebinger T, Kinzl L, Claes L, Augat P.  
804 Correlation of bone mineral density with strength and microstructural parameters of cortical  
805 bone in vitro. *Bone.* 2002 Jul 1;31(1):90–5.
- 806 57. Gerbaix M, Metz L, Mac-Way F, Lavet C, Guillet C, Walrand S, Masgrau A, Linossier M-  
807 T, Vico L, Courteix D. Impact of an obesogenic diet program on bone densitometry, micro  
808 architecture and metabolism in male rat. *Lipids Health Dis.* 2012 Jul 10;11(1):91.
- 809 58. Palacio-Mancheno PE, Larriera AI, Doty SB, Cardoso L, Fritton SP. 3D Assessment of  
810 Cortical Bone Porosity and Tissue Mineral Density Using High-Resolution Micro-CT:  
811 Effects of Resolution and Threshold Method. *J. Bone Miner. Res. Off. J. Am. Soc. Bone*  
812 *Miner. Res.* [Internet]. 2014 Jan [cited 2019 Jul 27];29(1). Available from:  
813 <https://www.ncbi.nlm.nih.gov/pmc/articles/PMC3870034/>
- 814 59. Kerckhofs G, Durand M, Vangoitsenhoven R, Marin C, Van der Schueren B, Carmeliet G,  
815 Luyten FP, Geris L, Vandamme K. Changes in bone macro- and microstructure in diabetic  
816 obese mice revealed by high resolution microfocus X-ray computed tomography. *Sci. Rep.*  
817 2016 Oct 19;6:35517.

- 818 60. McCreadie BR, Morris MD, Chen T, Sudhaker Rao D, Finney WF, Widjaja E, Goldstein  
819 SA. Bone tissue compositional differences in women with and without osteoporotic  
820 fracture. *Bone*. 2006 Dec 1;39(6):1190–5.
- 821 61. Kohn DH, Sahar ND, Wallace JM, Golcuk K, Morris MD. Exercise Alters Mineral and  
822 Matrix Composition in the Absence of Adding New Bone. *Cells Tissues Organs* Basel.  
823 2008 Dec;189(1–4):33–7.
- 824 62. Saito M, Kida Y, Kato S, Marumo K. Diabetes, Collagen, and Bone Quality. *Curr.*  
825 *Osteoporos. Rep.* 2014 Jun 1;12(2):181–8.
- 826 63. Rubin MR, Paschalis EP, Poundarik A, Sroga GE, McMahon DJ, Gamsjaeger S,  
827 Klaushofer K, Vashishth D. Advanced Glycation Endproducts and Bone Material  
828 Properties in Type 1 Diabetic Mice. *PLOS ONE*. 2016 May 3;11(5):e0154700.
- 829 64. Hammond MA, Gallant MA, Burr DB, Wallace JM. Nanoscale changes in collagen are  
830 reflected in physical and mechanical properties of bone at the microscale in diabetic rats.  
831 *Bone*. 2014 Mar 1;60:26–32.
- 832 65. Ogawa N, Yamaguchi T, Yano S, Yamauchi M, Yamamoto M, Sugimoto T. The  
833 Combination of High Glucose and Advanced Glycation End-products (AGEs) Inhibits the  
834 Mineralization of Osteoblastic MC3T3-E1 Cells through Glucose-induced Increase in the  
835 Receptor for AGEs. *Horm. Metab. Res.* 2007 Dec;39(12):871–5.
- 836 66. Vashishth D, Gibson GJ, Khoury JI, Schaffler MB, Kimura J, Fyhrie DP. Influence of  
837 nonenzymatic glycation on biomechanical properties of cortical bone. *Bone*. 2001 Feb  
838 1;28(2):195–201.

- 839 67. Roche B, David V, Vanden-Bossche A, Peyrin F, Malaval L, Vico L, Lafage-Proust M-H.  
840 Structure and quantification of microvascularisation within mouse long bones: What and  
841 how should we measure? *Bone*. 2012 Jan;50(1):390–9.
- 842 68. Kerckhofs G, Stegen S, van Gastel N, Sap A, Falgayrac G, Penel G, Durand M, Luyten FP,  
843 Geris L, Vandamme K, Parac-Vogt T, Carmeliet G. Simultaneous three-dimensional  
844 visualization of mineralized and soft skeletal tissues by a novel microCT contrast agent  
845 with polyoxometalate structure. *Biomaterials*. 2018 Mar 1;159:1–12.
- 846 69. Griffith JF. Imaging vasculature of bone. *J. Orthop. Transl.* 2014;4(2):192.
- 847 70. Prisby RD, Swift JM, Bloomfield SA, Hogan HA, Delp MD. Altered bone mass, geometry  
848 and mechanical properties during the development and progression of type 2 diabetes in the  
849 Zucker diabetic fatty rat. *J. Endocrinol.* 2008 Dec 1;199(3):379–88.
- 850 71. Iki M, Fujita Y, Kouda K, Yura A, Tachiki T, Tamaki J, Winzenrieth R, Sato Y, Moon J-S,  
851 Okamoto N, Kurumatani N. Hyperglycemia is associated with increased bone mineral  
852 density and decreased trabecular bone score in elderly Japanese men: The Fujiwara-kyo  
853 osteoporosis risk in men (FORMEN) study. *Bone*. 2017 Dec 1;105(Supplement C):18–25.
- 854 72. Terada M, Inaba M, Yano Y, Hasuma T, Nishizawa Y, Morii H, Otani S. Growth-inhibitory  
855 effect of a high glucose concentration on osteoblast-like cells. *Bone*. 1998 Jan;22(1):17–23.
- 856 73. Cunha JS, Ferreira VM, Maquigussa E, Naves MA, Boim MA. Effects of high glucose and  
857 high insulin concentrations on osteoblast function in vitro. *Cell Tissue Res.* 2014 Oct  
858 1;358(1):249–56.
- 859 74. Takeda S, Elefteriou F, Levasseur R, Liu X, Zhao L, Parker KL, Armstrong D, Ducy P,  
860 Karsenty G. Leptin Regulates Bone Formation via the Sympathetic Nervous System. *Cell*.  
861 2002 Nov 1;111(3):305–17.



- 862 75. Auvinen HE, Romijn JA, Biermasz NR, Pijl H, Havekes LM, Smit JWA, Rensen PCN,  
863 Pereira AM. The effects of high fat diet on the basal activity of the hypothalamus–  
864 pituitary–adrenal axis in mice. *J. Endocrinol.* 2012 Aug 1;214(2):191–7.
- 865 76. Henneicke H, Herrmann M, Kalak R, Brennan-Speranza TC, Heinevetter U, Bertollo N,  
866 Day RE, Huscher D, Buttgereit F, Dunstan CR, Seibel MJ, Zhou H. Corticosterone  
867 selectively targets endo-cortical surfaces by an osteoblast-dependent mechanism. *Bone.*  
868 2011 Oct 1;49(4):733–42.
- 869 77. Hamrick MW, Ferrari SL. Leptin and the sympathetic connection of fat to bone.  
870 *Osteoporos. Int.* 2008 Jul 1;19(7):905–12.
- 871 78. Yue R, Zhou BO, Shimada IS, Zhao Z, Morrison SJ. Leptin Receptor Promotes  
872 Adipogenesis and Reduces Osteogenesis by Regulating Mesenchymal Stromal Cells in  
873 Adult Bone Marrow. *Cell Stem Cell.* 2016 Jun 2;18(6):782–96.
- 874 79. John K, Marino JS, Sanchez ER, Hinds TD. The glucocorticoid receptor: cause of or cure  
875 for obesity? *Am. J. Physiol.-Endocrinol. Metab.* 2015 Dec 29;310(4):E249–57.
- 876 80. McCabe LR, Irwin R, Tekalur A, Evans C, Schepper JD, Parameswaran N, Ciancio M.  
877 Exercise prevents high fat diet-induced bone loss, marrow adiposity and dysbiosis in male  
878 mice. *Bone.* 2019 Jan 1;118:20–31.
- 879 81. Marcinko K, Sikkema SR, Samaan MC, Kemp BE, Fullerton MD, Steinberg GR. High  
880 intensity interval training improves liver and adipose tissue insulin sensitivity. *Mol. Metab.*  
881 2015 Dec;4(12):903–15.

882

## Figure Legends

**Figure 1:** Experimental design: Mice were fed either control fat diet (CFD) or high fat diet (HFD) starting at 5 weeks of age. After 9 weeks of diet, groups either were exercised (moving treadmill) or remained sedentary (stationary treadmill) for 8 weeks. After 17 total weeks of diet and 8 weeks of exercise, various endpoint vascular and bone metrics were analyzed.

**Figure 2:** A) Bone composition was assessed by Raman spectroscopy at three positions in the posterior, lateral, anterior, and medial quadrants within the cortical diaphysis of right femora: mid-cortex (2x5 point array) and endosteal and periosteal edges (1x6 linear array). B) Raman spectra were normalized to the phosphate  $\nu_1$  band intensity (b), and crystallinity was calculated as the inverse of the full-width at half maximum of the phosphate  $\nu_1$  band. Mineral-to-matrix band intensity ratios were calculated for phosphate  $\nu_1$  relative to the summation of proline and hydroxyproline (a), amide I (e), and amide III (d). Carbonate substitution (carbonate  $\nu_1$  (c)/ phosphate  $\nu_1$ ) and carbonate-to-matrix ratio (carbonate  $\nu_1$  / amide I) were also calculated.

**Figure 3:** A) Body mass was consistently higher with HFD than CFD at every timepoint. B) Weekly fasting glucose concentration were higher in the HFD group at Week 11, 13, 15, 16, and 17. C) HFD had lower glucose tolerance (higher area under curve) than CFD at Weeks 13 and 17 of diet. Data in A-B presented as estimated least-squares mean  $\pm$  95% confidence interval. a:  $p < 0.05$  HFD vs. CFD (main effect), b:  $p < 0.10$  HFD-Exercise (Ex) vs. HFD-Sedentary (Sed).

**Figure 4:** Bone perfusion in the proximal tibial metaphysis was significantly higher in exercise (Ex) than in sedentary (Sed) groups but not with HFD compared to CFD. c:  $p < 0.05$  Ex vs. Sed (main effect). PU = perfusion unit (arbitrary).

**Figure 5:** Relative to CFD, HFD groups exhibited significantly less robust trabecular architecture in the distal femur, with A) decreased bone volume fraction and B) trabecular number and C) increased trabecular separation, but D) no differences in trabecular thickness. a:  $p < 0.05$  HFD vs. CFD (main effect).

**Figure 6:** Representative force-displacement curves from femur three-point bending to failure. Relative to CFD, HFD significantly reduced yield load and nearly reduced stiffness and ultimate load. a:  $p < 0.05$  HFD vs. CFD (main effect), d:  $p < 0.10$  HFD vs. CFD (main effect).

**Figure 7:** Relative to sedentary, exercise groups had increased A) mineral crystallinity on the periosteal edge. Along the endosteal edge, exercise increased B) phosphate  $\nu_1$  to combined proline and hydroxyproline ratio, C) phosphate  $\nu_1$  to amide I ratio, D) phosphate  $\nu_1$  to amide III ratio, and E) carbonate  $\nu_1$  to amide I ratio but not F) carbonate substitution. Points represent mean of all quadrants per femur, lines and bars represent estimated least-squares mean  $\pm$  95% confidence interval c:  $p < 0.05$  Ex vs. Sed (main effect), d:  $p < 0.10$  HFD vs CFD (main effect), g:  $p < 0.10$  Ex vs. Sed (main effect).

## Tables

**Table 1:** Cancellous and Cortical Bone Structure in the Femur (mean  $\pm$  SD)

| Trait                                              | Control Fat Diet |                  | High Fat Diet                 |                               |
|----------------------------------------------------|------------------|------------------|-------------------------------|-------------------------------|
|                                                    | Sedentary        | Exercise         | Sedentary                     | Exercise                      |
| <b>Distal metaphysis (cancellous and cortical)</b> |                  |                  |                               |                               |
| Conn.D (mm <sup>-3</sup> )                         | 152.7 $\pm$ 52.9 | 144.1 $\pm$ 21.8 | 82.4 $\pm$ 13.5 <sup>a</sup>  | 67.0 $\pm$ 22.8 <sup>a</sup>  |
| DA                                                 | 1.39 $\pm$ 0.14  | 1.48 $\pm$ 0.21  | 1.40 $\pm$ 0.17               | 1.32 $\pm$ 0.09               |
| Trabecular vBMD (mg/cm <sup>3</sup> )              | 190.8 $\pm$ 59.5 | 165.6 $\pm$ 18.5 | 141.0 $\pm$ 33.9 <sup>a</sup> | 106.5 $\pm$ 21.1 <sup>a</sup> |
| Trabecular TMD (mg/cm <sup>3</sup> )               | 811.3 $\pm$ 12.8 | 802.7 $\pm$ 18.0 | 814.0 $\pm$ 23.9              | 803.2 $\pm$ 4.9               |
| Cortical vBMD (mg/cm <sup>3</sup> )                | 682.5 $\pm$ 31.4 | 670.1 $\pm$ 21.1 | 678.6 $\pm$ 17.3              | 670.5 $\pm$ 9.0               |
| Ct.Ar (mm <sup>2</sup> )                           | 0.99 $\pm$ 0.11  | 0.94 $\pm$ 0.06  | 0.99 $\pm$ 0.17               | 0.90 $\pm$ 0.07               |
| Tt.Ar (mm <sup>2</sup> )                           | 3.75 $\pm$ 0.20  | 3.67 $\pm$ 0.36  | 3.62 $\pm$ 0.43               | 3.57 $\pm$ 0.16               |
| Ct.Ar/Tt.Ar (%)                                    | 26.5 $\pm$ 2.1   | 25.7 $\pm$ 1.6   | 27.1 $\pm$ 1.5                | 25.1 $\pm$ 1.4                |
| Ct.Th ( $\mu$ m)                                   | 126.0 $\pm$ 9.3  | 122.0 $\pm$ 4.3  | 125.2 $\pm$ 11.4              | 118.6 $\pm$ 6.2               |
| <b>Diaphysis (cortical)</b>                        |                  |                  |                               |                               |
| vBMD (mg/cm <sup>3</sup> )                         | 841.5 $\pm$ 15.0 | 834.6 $\pm$ 8.3  | 841.0 $\pm$ 16.7              | 824.6 $\pm$ 14.7              |
| Ct.Ar (mm <sup>2</sup> )                           | 1.12 $\pm$ 0.10  | 1.04 $\pm$ 0.08  | 1.00 $\pm$ 0.18               | 0.93 $\pm$ 0.05               |
| Tt.Ar (mm <sup>2</sup> )                           | 2.62 $\pm$ 0.22  | 2.42 $\pm$ 0.35  | 2.33 $\pm$ 0.37               | 2.27 $\pm$ 0.11               |
| Ct.Ar/Tt.Ar (%)                                    | 39.7 $\pm$ 2.3   | 41.5 $\pm$ 3.5   | 41.8 $\pm$ 0.6                | 40.5 $\pm$ 1.6                |
| Ct.Th ( $\mu$ m)                                   | 191.0 $\pm$ 10.5 | 193.0 $\pm$ 9.2  | 194.1 $\pm$ 20.4              | 186.7 $\pm$ 9.7               |
| <b>Mid-diaphysis (cortical)</b>                    |                  |                  |                               |                               |
| I <sub>ML</sub> (mm <sup>4</sup> )                 | 0.22 $\pm$ 0.04  | 0.19 $\pm$ 0.05  | 0.18 $\pm$ 0.06               | 0.17 $\pm$ 0.02               |
| I <sub>AP</sub> (mm <sup>4</sup> )                 | 0.55 $\pm$ 0.09  | 0.48 $\pm$ 0.10  | 0.45 $\pm$ 0.15               | 0.39 $\pm$ 0.03               |
| Femur Length (mm)                                  | 16.4 $\pm$ 0.3   | 16.1 $\pm$ 0.8   | 15.9 $\pm$ 0.3                | 15.9 $\pm$ 0.2                |

a: p < 0.05 HFD vs. CFD (main effect)

**Table 2:** Dynamic Indices of Cortical Bone Remodeling in the Tibial Diaphysis (mean  $\pm$  SD)

| Trait                                                      | Control Fat Diet |                              | High Fat Diet   |                             |
|------------------------------------------------------------|------------------|------------------------------|-----------------|-----------------------------|
|                                                            | Sedentary        | Exercise                     | Sedentary       | Exercise                    |
| <b>Endosteal</b>                                           |                  |                              |                 |                             |
| MS/BS (%)                                                  | 27.8 $\pm$ 3.6   | 43.1 $\pm$ 13.4 <sup>c</sup> | 27.0 $\pm$ 12.7 | 39.8 $\pm$ 6.8 <sup>c</sup> |
| MAR ( $\mu$ m/day)                                         | 0.59 $\pm$ 0.25  | 0.34 $\pm$ 0.24              | 0.33 $\pm$ 0.41 | 0.49 $\pm$ 0.36             |
| BFR/BS ( $\mu$ m <sup>3</sup> / $\mu$ m <sup>2</sup> /day) | 0.30 $\pm$ 0.12  | 0.18 $\pm$ 0.13              | 0.13 $\pm$ 0.16 | 0.23 $\pm$ 0.16             |
| <b>Periosteal</b>                                          |                  |                              |                 |                             |
| MS/BS (%)                                                  | 4.3 $\pm$ 5.1    | 13.4 $\pm$ 15.1              | 4.4 $\pm$ 6.7   | 8.7 $\pm$ 15.2              |
| MAR ( $\mu$ m/day)                                         | 0.12 $\pm$ 0.16  | 0.22 $\pm$ 0.26              | 0.10 $\pm$ 0.13 | 0.20 $\pm$ 0.26             |
| BFR/BS ( $\mu$ m <sup>3</sup> / $\mu$ m <sup>2</sup> /day) | 0.02 $\pm$ 0.02  | 0.09 $\pm$ 0.12              | 0.01 $\pm$ 0.01 | 0.05 $\pm$ 0.10             |

c: p < 0.05 Exercise vs. Sedentary (main effect)

**Table 3:** Whole Bone, Apparent, and Tissue Mechanical Properties in the Femoral Diaphysis

| Trait                                                                                              | Control Fat Diet |              | High Fat Diet               |                             |
|----------------------------------------------------------------------------------------------------|------------------|--------------|-----------------------------|-----------------------------|
|                                                                                                    | Sedentary        | Exercise     | Sedentary                   | Exercise                    |
| <b>Whole bone mechanical properties (three-point bending) (mean ± standard deviation)</b>          |                  |              |                             |                             |
| F <sub>yield</sub> (N)                                                                             | 16.0 ± 2.1       | 16.1 ± 3.7   | 13.8 ± 2.3 <sup>a,f</sup>   | 12.6 ± 1.3 <sup>a,f</sup>   |
| F <sub>ult</sub> (N)                                                                               | 22.3 ± 4.1       | 20.9 ± 2.1   | 19.1 ± 3.1 <sup>d</sup>     | 18.0 ± 1.6 <sup>d</sup>     |
| Stiffness (N/mm)                                                                                   | 137.5 ± 21.9     | 132.9 ± 17.6 | 119.3 ± 25.9 <sup>d,e</sup> | 101.7 ± 26.2 <sup>d,e</sup> |
| PYD (mm)                                                                                           | 0.13 ± 0.04      | 0.11 ± 0.05  | 0.11 ± 0.02                 | 0.14 ± 0.02                 |
| Work-to-fracture (mJ)                                                                              | 6.09 ± 0.98      | 4.43 ± 0.97  | 3.79 ± 1.60                 | 5.02 ± 0.75                 |
| <b>Apparent material properties (three-point bending) (mean ± standard deviation)</b>              |                  |              |                             |                             |
| σ <sub>yield</sub> (MPa)                                                                           | 93.4 ± 8.9       | 100.5 ± 22.4 | 96.5 ± 15.8                 | 88.15 ± 5.0                 |
| σ <sub>ult</sub> (MPa)                                                                             | 117.6 ± 6.1      | 121.9 ± 11.2 | 117.2 ± 12.7                | 117.3 ± 6.9                 |
| E (GPa)                                                                                            | 3.65 ± 0.15      | 4.15 ± 0.74  | 3.89 ± 0.73                 | 3.58 ± 1.19                 |
| <b>Tissue material properties (nanoindentation) (least squares mean ± 95% confidence interval)</b> |                  |              |                             |                             |
| H (GPa)                                                                                            | 0.96 ± 0.21      | 0.85 ± 0.22  | 0.90 ± 0.20                 | 0.87 ± 0.21                 |
| E <sub>r</sub> (GPa)                                                                               | 25.6 ± 5.6       | 22.7 ± 5.9   | 25.2 ± 5.6                  | 22.6 ± 5.5                  |

(main effects) a: p < 0.05 HFD vs. CFD raw data; d: p < 0.10 HFD vs. CFD raw data; e: p < 0.10 HFD vs. CFD body mass-adjusted; f: p < 0.10 HFD vs. CFD femur length-adjusted

**Table 4.** Osteovascular Structure in the Distal Femoral Metaphysis (mean ± standard deviation)

| Metric                                             | CFD         | HFD                     | Sedentary   | Exercise    |
|----------------------------------------------------|-------------|-------------------------|-------------|-------------|
| Vessel area fraction (% EMCN <sup>+</sup> )        | 7.9 ± 3.6   | 7.2 ± 1.9               | 5.8 ± 3.5   | 8.9 ± 1.6   |
| Bone surface area fraction (% COL-1 <sup>+</sup> ) | 19.2 ± 2.4  | 13.1 ± 2.5 <sup>a</sup> | 15.8 ± 4.3  | 17.1 ± 4.2  |
| Vessel-to-bone distance (μm)                       | 78.6 ± 41.8 | 60.5 ± 8.0              | 85.9 ± 41.7 | 59.5 ± 20.5 |

a: p < 0.05 HFD vs. CFD (main effect). Area fractions expressed at % of total area.

**Table 5.** Serum Concentrations of Bone-Vascular Crosstalk Markers (mean ± standard deviation)

| Marker         | Control Fat Diet |                         | High Fat Diet |             |
|----------------|------------------|-------------------------|---------------|-------------|
|                | Sedentary        | Exercise                | Sedentary     | Exercise    |
| BMP2 (pg/mL)   | 80.7 ± 12.1      | 72.0 ± 7.5              | 73.8 ± 3.4    | 98.9 ± 31.0 |
| VEGF-A (pg/mL) | 42.8 ± 13.4      | 52.0 ± 8.8 <sup>a</sup> | 55.4 ± 8.0    | 38.0 ± 8.5  |

## Figures

Figure 1

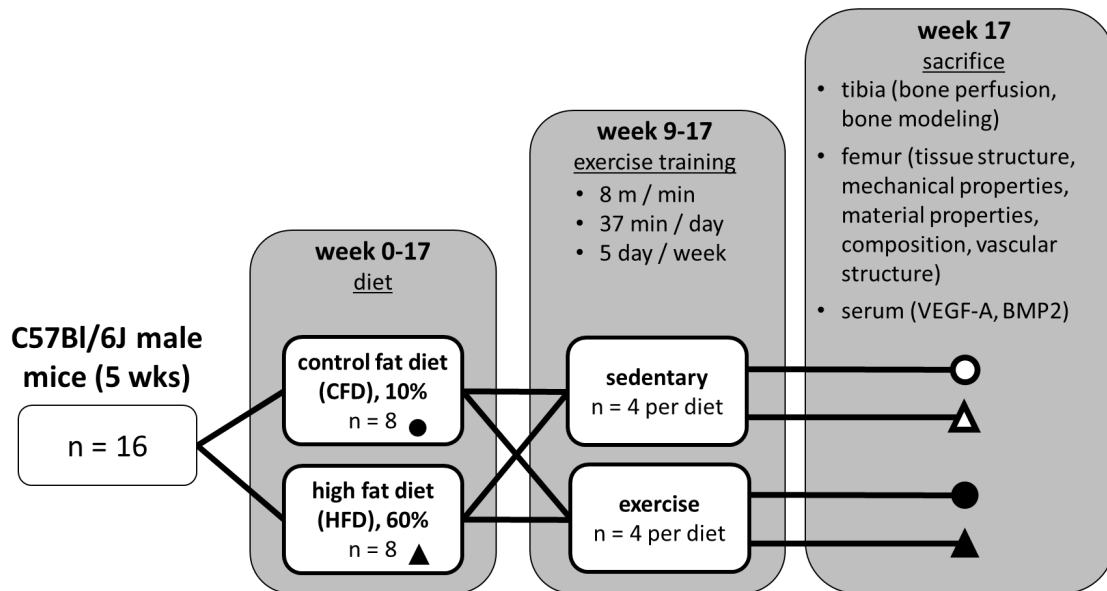

Figure 2

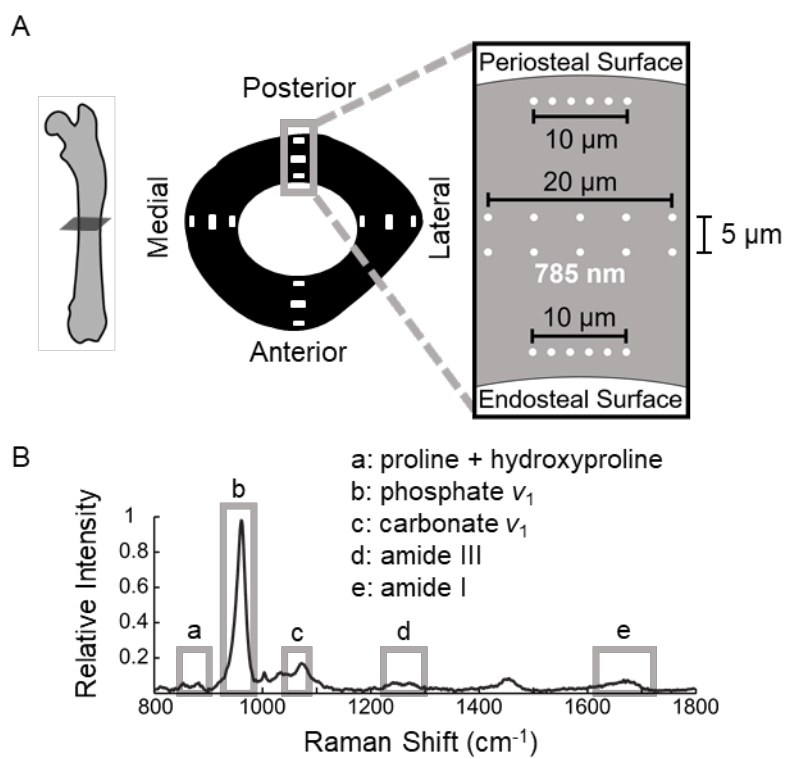

Figure 3

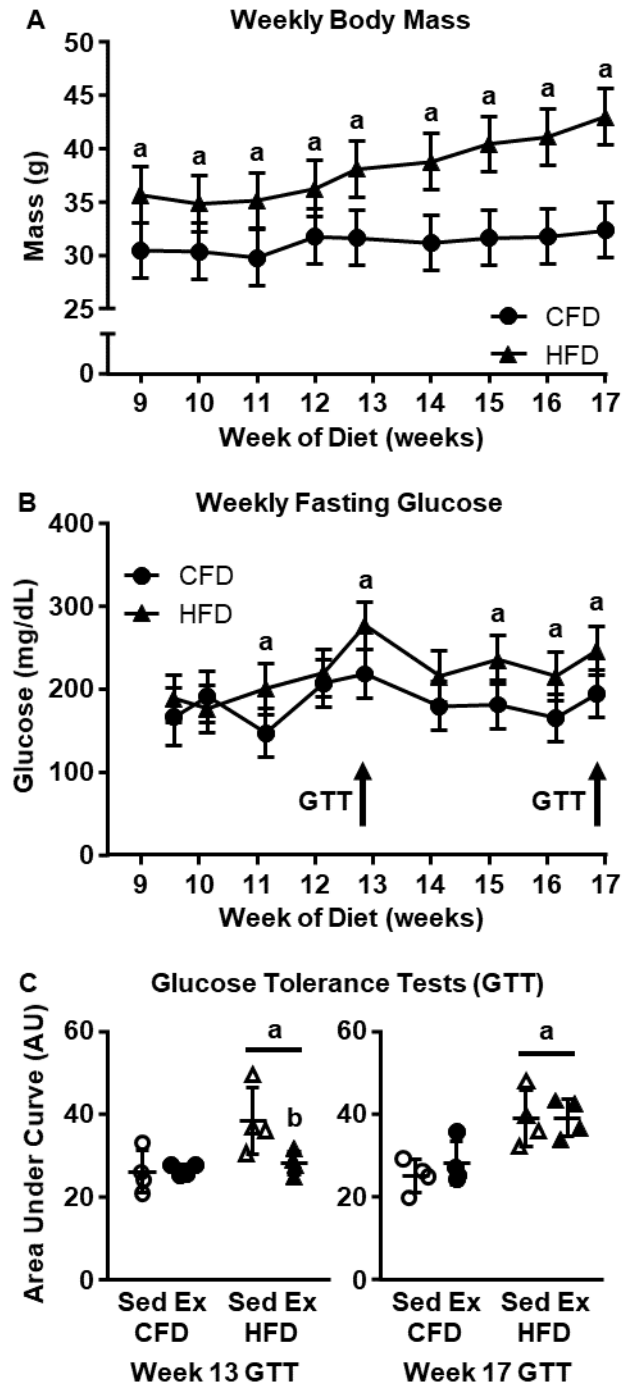



Figure 4

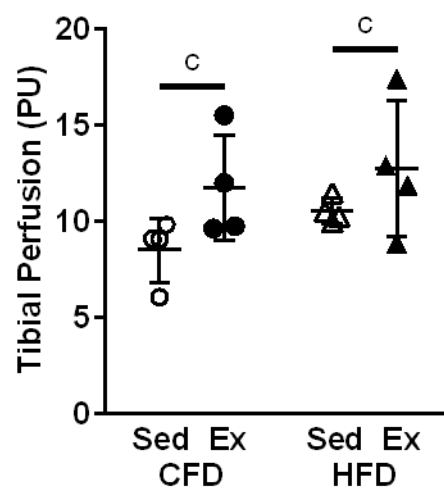

Figure 5

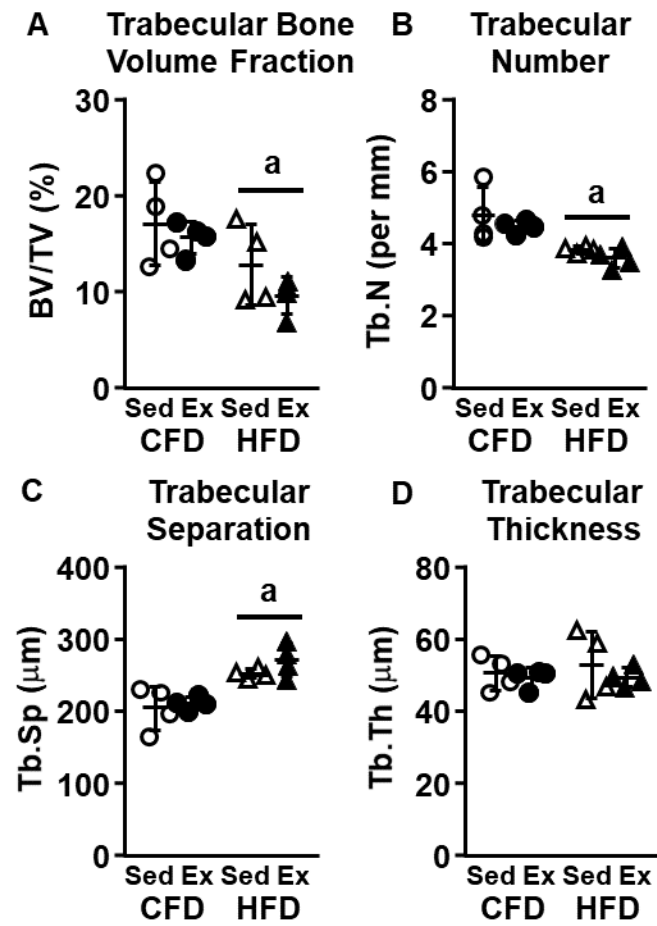

Figure 6

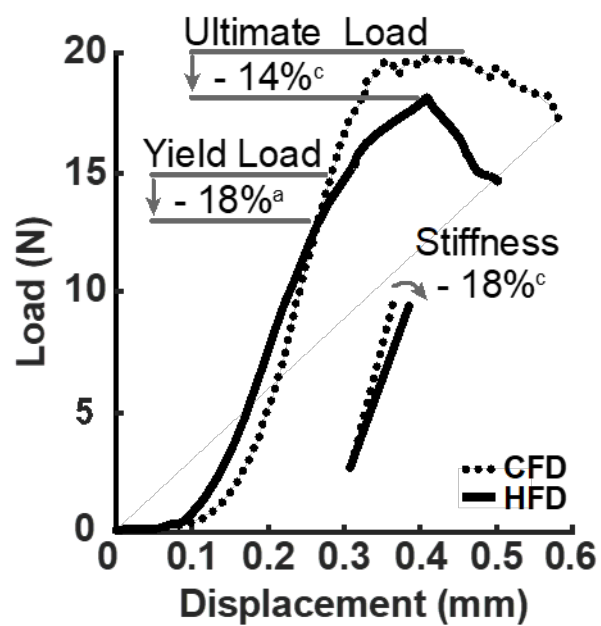

Figure 7

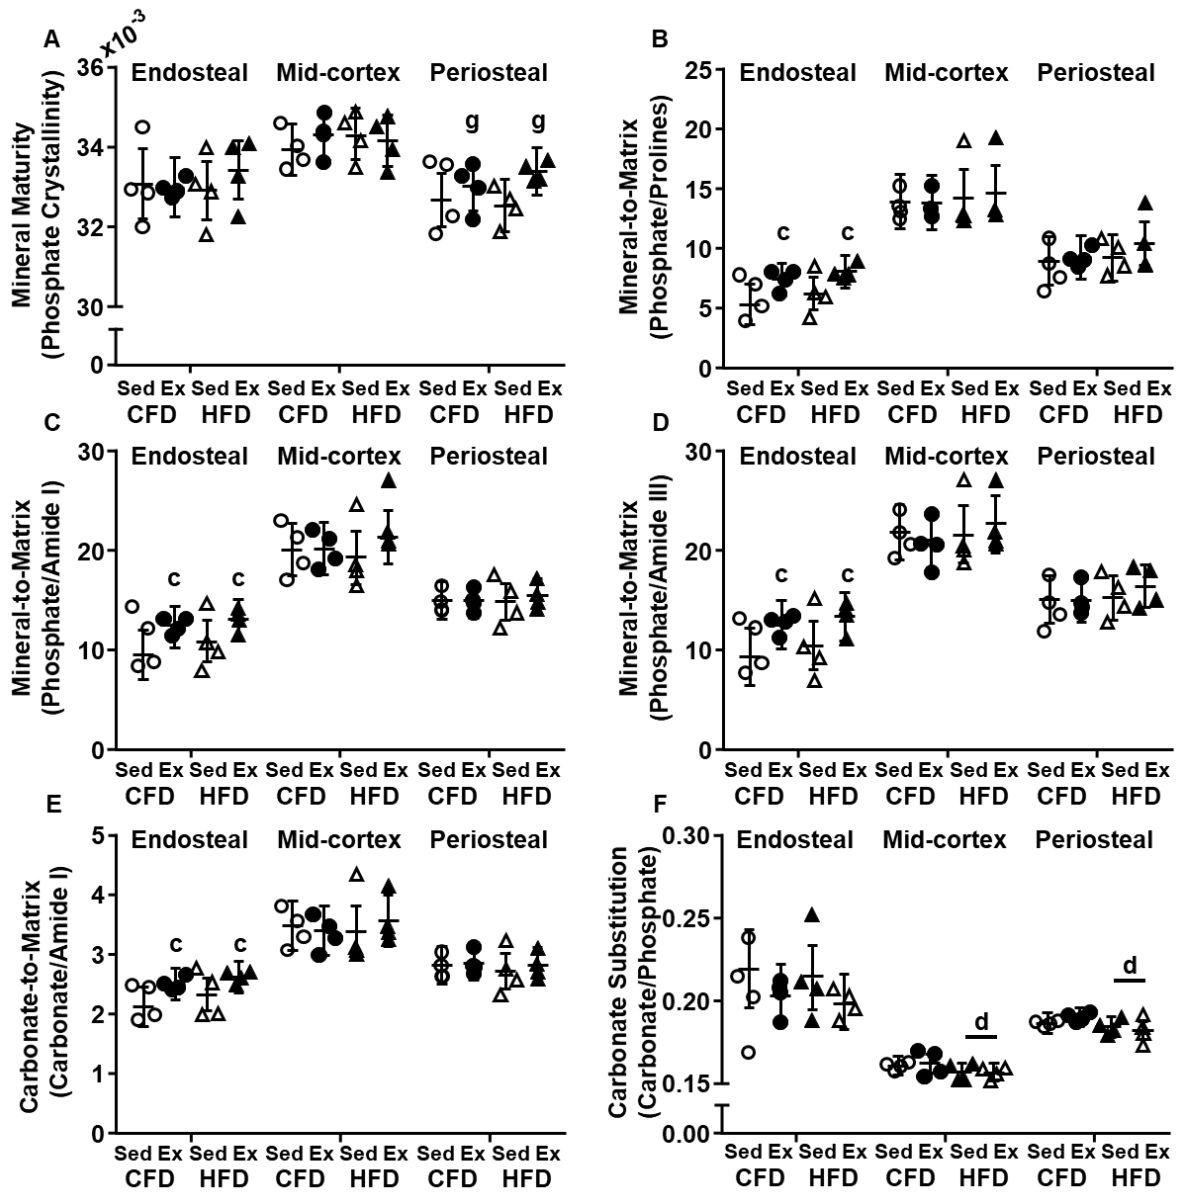

Source: http://biorxiv.org/content/10.1101/729624v1.full.pdf
